# Supplementary material for: Carbon–carbon vs. carbon–oxygen bond activation in 2- and 3-furonitriles with nickel
Source: Royal Society of Chemistry journal article supplement (doi:10.1039/c6ra20244f), 2016-01-01
Supplement: c6ra20244f1.pdf [file c6ra20244f1.pdf]

## SUPPORTING INFORMATION

### Carbon-Carbon vs. Carbon-Oxygen bond activation in 2- and 3-Furonitriles with Nickel.

Ilnett García-Ventura, Marcos Flores-Alamo and Juventino J. García\*

*Facultad de Química, Universidad Nacional Autónoma de México. Ciudad*

*Universitaria. Mexico City, 04510.*

[juvent@unam.mx](mailto:juvent@unam.mx)

## INDEX OF FIGURES

**Figure S1.**  $^{31}\text{P}\{^1\text{H}\}$ -NMR following up of stoichiometric reaction between complex (1) and 2-FN at room temperature in THF- $d_8$ . \_\_\_\_\_ S4

**Figure S2.**  $^1\text{H}$ -NMR following up of stoichiometric reaction between complex (1) and 2-FN at room temperature in THF- $d_8$ . \_\_\_\_\_ S4

**Figure S3.**  $^{31}\text{P}\{^1\text{H}\}$ -NMR following up of reaction between complex (1) and an excess of 2-FN at room temperature in THF- $d_8$ . \* Impurity from complex (1). \_\_\_ S6

**Figure S4.**  $^1\text{H}$ -NMR following up of reaction between complex (1) and an excess of 2-FN at room temperature in THF- $d_8$ . \_\_\_\_\_ S6

**Figure S5.**  $^{31}\text{P}\{^1\text{H}\}$ -NMR following up of thermolysis of complex (7) at 100 °C in THF- $d_8$ . \_\_\_\_\_ S8

**Figure S6.**  $^1\text{H}$ -NMR following up of thermolysis of complex (7) at 100 °C in THF- $d_8$ . \_\_\_\_\_ S9

**Figure S7.**  $^{31}\text{P}\{^1\text{H}\}$ -NMR following up of reaction between complex (1) and 3-FN by 6 days at room temperature in THF- $d_8$ . \_\_\_\_\_ S12

**Figure S8.**  $^1\text{H}$ -NMR following up of reaction between complex (1) and 3-FN by 6 days at room temperature in THF- $d_8$ . \_\_\_\_\_ S12

**Figure S9.** Comparison between  $^1\text{H}$ -NMR spectrum of 3-FN and reaction solution after 6 days of reaction at room temperature by in THF- $d_8$ . \_\_\_\_\_ S13

# INDEX OF SPECTRUMS

**Spectrum S1.**  $^{31}\text{P}\{^1\text{H}\}$ -NMR spectrum of initial reaction between complex (1) and an excess of 2-FN in THF- $d_8$  at room temperature. Signals assigned to complex (2). \_\_\_\_\_ S5

**Spectrum S2.**  $^1\text{H}$ -NMR spectrum of initial reaction between complex (1) and an excess of 2-FN in THF- $d_8$  at room temperature. Signals assigned to complex (2) and 2-FN. \_\_\_\_\_ S5

**Spectrum S3.**  $^{13}\text{C}\{^1\text{H}\}$ -NMR spectrum of complex (7) in THF- $d_8$  at room temperature. Signals assigned to heteroaromatic carbons and nitrile carbon. \_\_ S7

**Spectrum S4.** Mass spectrum of 2,2'-bifuryl, resulted from reaction of complex (7) at room temperature by 6 days in THF- $d_8$ . \_\_\_\_\_ S8

**Spectrum S5.**  $^{31}\text{P}\{^1\text{H}\}$ -NMR spectrum of pure complex (9). \_\_\_\_\_ S9

**Spectrum S6.**  $^1\text{H}$ -NMR spectrum of pure complex (9). \_\_\_\_\_ S10

**Spectrum S7.** Mass spectrum corresponding to 2-FN, obtained from thermolysis of complex (7) after 4 hours at 100 °C \_\_\_\_\_ S11

**Spectrum S8.** Mass spectrum corresponding to (5), obtained from thermolysis of complex (7) after 4 hours at 100 °C. \_\_\_\_\_ S11

**Spectrum S9.**  $^{13}\text{C}\{^1\text{H}\}$ -NMR spectrum of complex (11) in THF- $d_8$  at room temperature. Signals assigned to heteroaromatic carbons and nitrile carbon. \_ S13

**Spectrum S10.** Mass spectrum corresponding to (13), obtained from thermolysis of complex (11) after 4 hours at 100 °C. \_\_\_\_\_ S14

**Spectrum S11.** Mass spectrum corresponding to 3-FN, obtained from thermolysis of complex (11) after 4 hours at 100 °C. \_\_\_\_\_ S15

# INDEX OF CRYSTALLOGRAPHIC TABLES

- Table S1.** *Crystal data and structure refinement for complex (7).* \_\_\_\_\_ S15
- Table S2.** *Atomic coordinates and equivalent isotropic displacement parameters for complex (7).* \_\_\_\_\_ S16
- Table S3.** *Bond lengths and angles for complex (7).* \_\_\_\_\_ S17
- Table S4.** *Anisotropic displacement parameters for complex (7).* \_\_\_\_\_ S22
- Table S5.** Torsion angles [°] for (7). \_\_\_\_\_ S22
- Table S6.** *Hydrogen bonds for complex (7).* \_\_\_\_\_ S24
- Table S7.** *Crystal data and structure refinement for complex (11).* \_\_\_\_\_ S24
- Table S8.** *Atomic coordinates and equivalent isotropic displacement parameters for complex (11).* \_\_\_\_\_ S25
- Table S9.** *Bond lengths and angles for complex (11).* \_\_\_\_\_ S26
- Table S10.** *Anisotropic displacement parameters for complex (11).* \_\_\_\_\_ S36
- Table S11.** Torsion angles [°] for (11). \_\_\_\_\_ S37
- Table S12.** *Hydrogen bonds for complex (11).* \_\_\_\_\_ S40

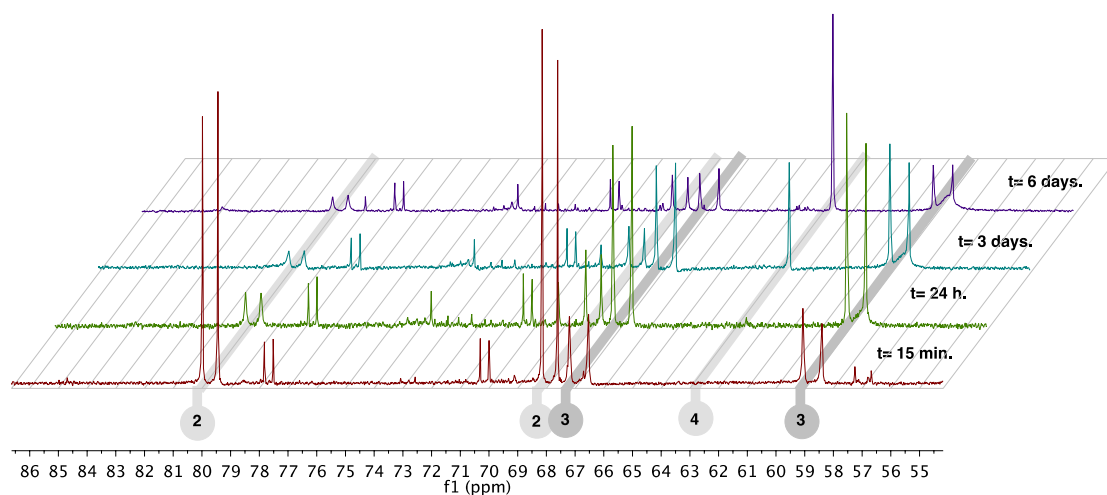

**Figure S1.**  $^{31}\text{P}\{^1\text{H}\}$ -NMR following up of stoichiometric reaction between complex (1) and 2-FN at room temperature in  $\text{THF-d}_8$ .

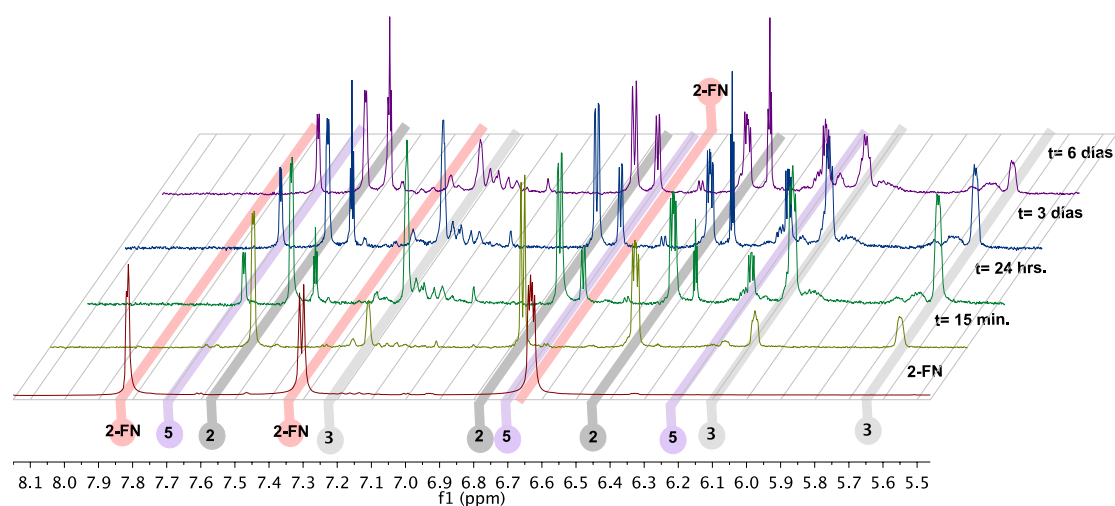

**Figure S2.**  $^1\text{H}$ -NMR following up of stoichiometric reaction between complex (1) and 2-FN at room temperature in  $\text{THF-d}_8$ .

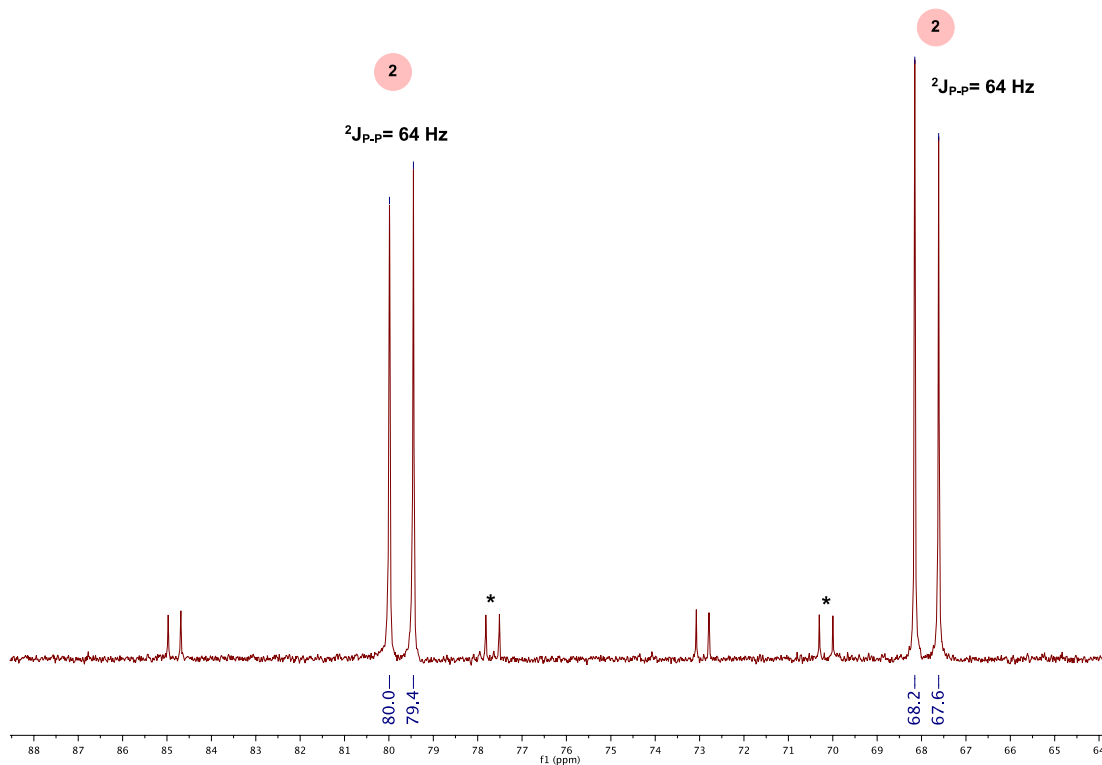

**Spectrum S1.**  $^{31}\text{P}\{^1\text{H}\}$ -NMR spectrum of initial reaction between complex (1) and an excess of 2-FN in THF- $d_8$  at room temperature. Signals assigned to complex (2). \* Impurity from complex (1).

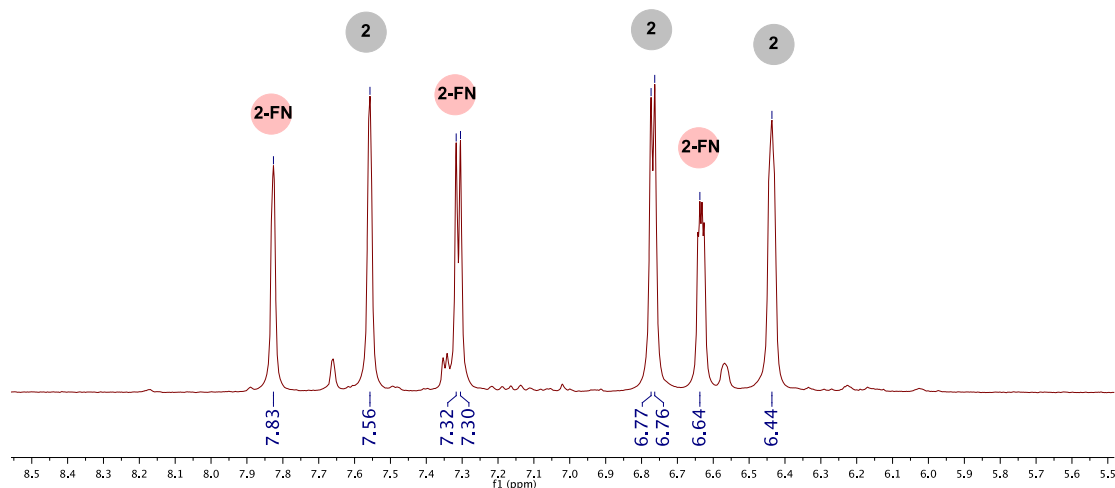

**Spectrum S2.**  $^1\text{H}$ -NMR spectrum of initial reaction between complex (1) and an excess of 2-FN in THF- $d_8$  at room temperature. Signals assigned to complex (2) and 2-FN.

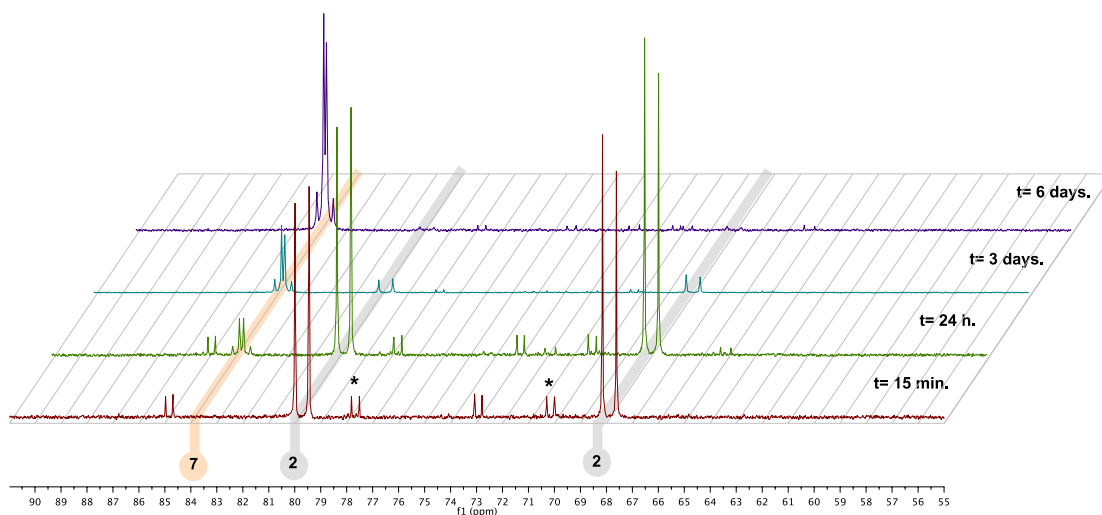

**Figure S3.**  $^{31}\text{P}\{^1\text{H}\}$ -NMR following up of reaction between complex (1) and an excess of 2-FN at room temperature in  $\text{THF-d}_8$ . \* Impurity from complex (1).

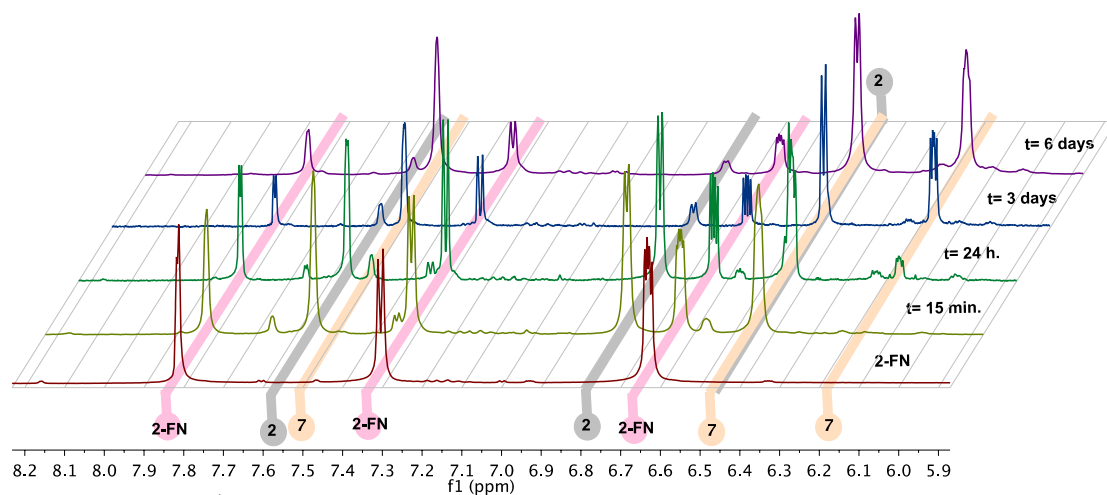

**Figure S4.**  $^1\text{H}$ -NMR following up of reaction between complex (1) and an excess of 2-FN at room temperature in  $\text{THF-d}_8$ .

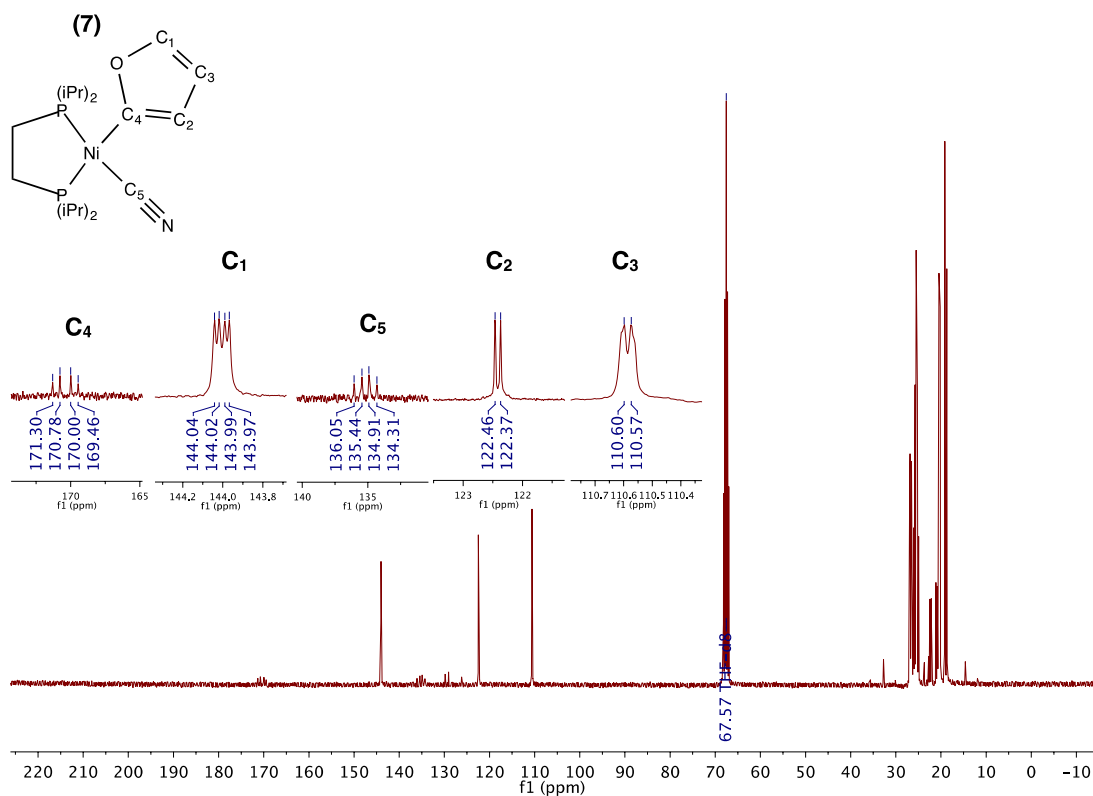

**Spectrum S3.**  $^{13}\text{C}\{^1\text{H}\}$ -NMR spectrum of complex **(7)** in THF- $\text{d}_8$  at room temperature. Signals assigned to heteroaromatic carbons and nitrile carbon.

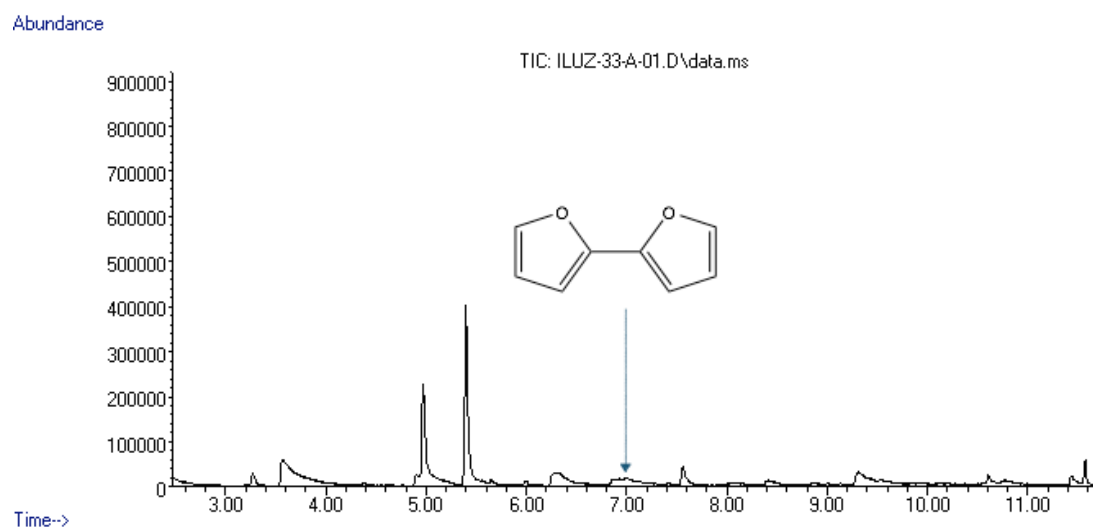

**Chromatogram S1.** Chromatogram of reaction of complex **(7)** after 6 days at room temperature in TFH- $\text{d}_8$ . Peak assigned to compound 2,2'-bifuryl.

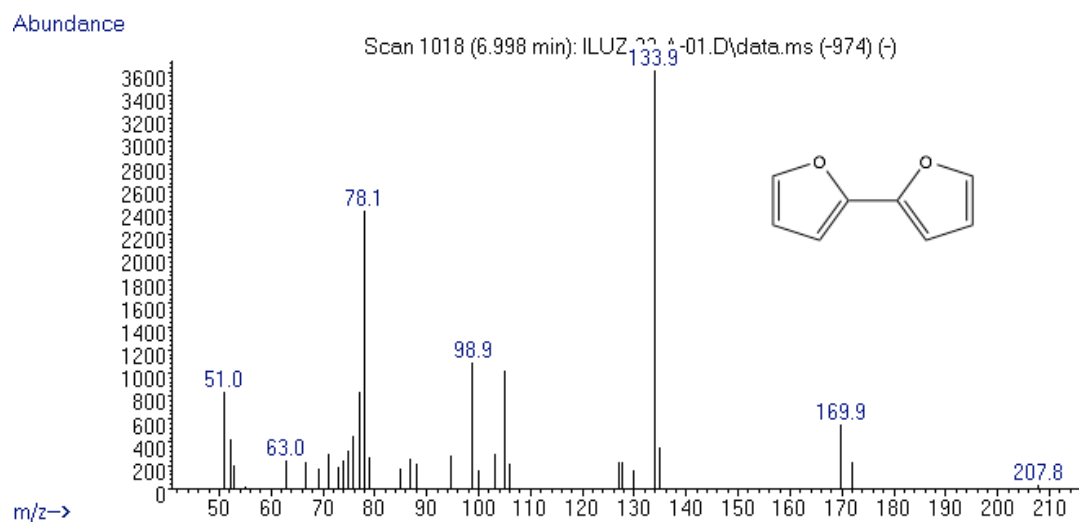

**Spectrum S4.** Mass spectrum of **2,2'-bifuryl**, resulted from reaction of complex **(7)** at room temperature by 6 days in THF- $d_8$ .

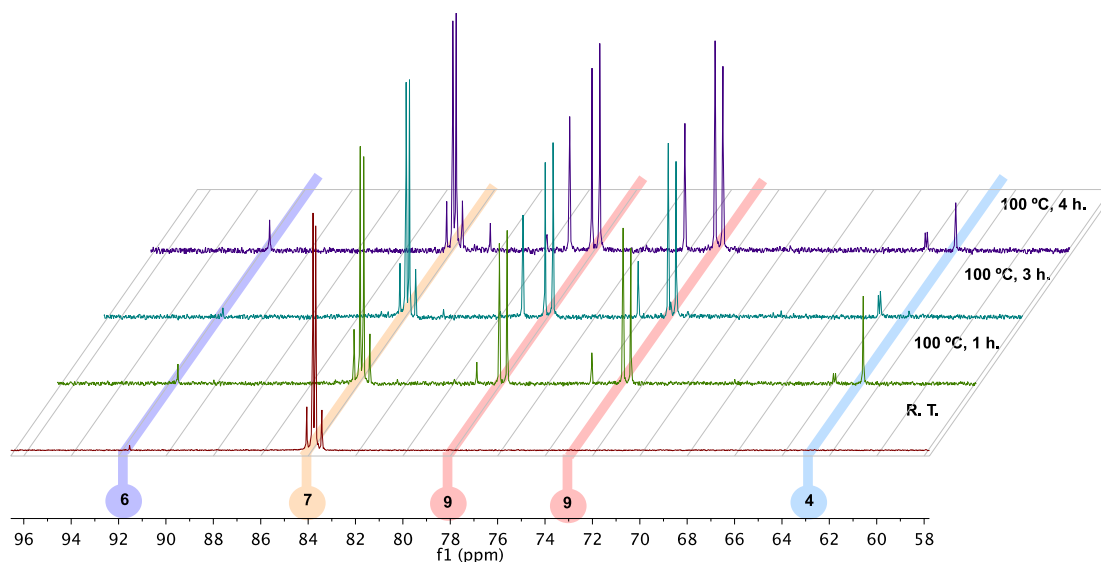

**Figure S5.**  $^{31}\text{P}\{^1\text{H}\}$ -NMR following up of thermolysis of complex **(7)** at 100 °C in THF- $d_8$ .



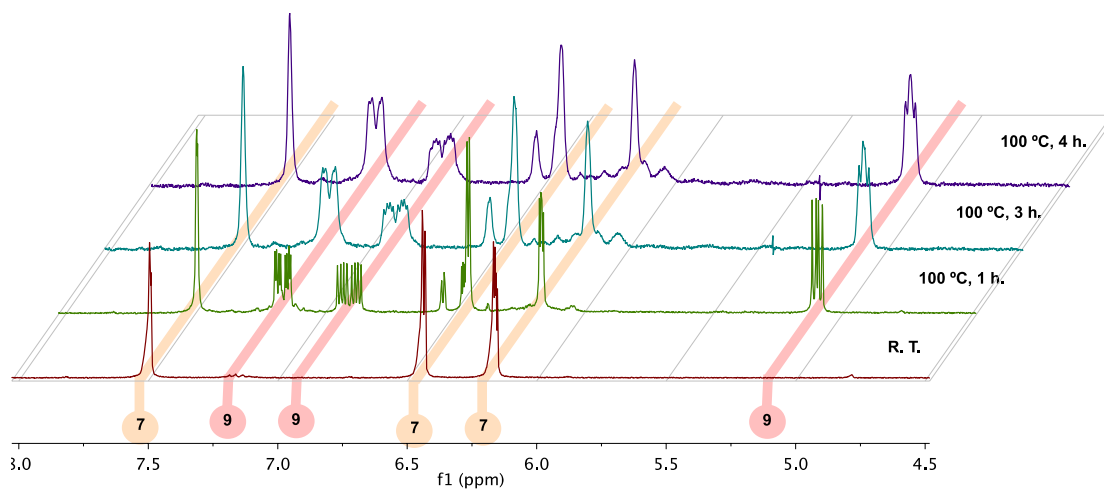

**Figure S6.**  $^1\text{H}$ -NMR following up of thermolysis of complex (7) at 100 °C in THF- $d_8$ .

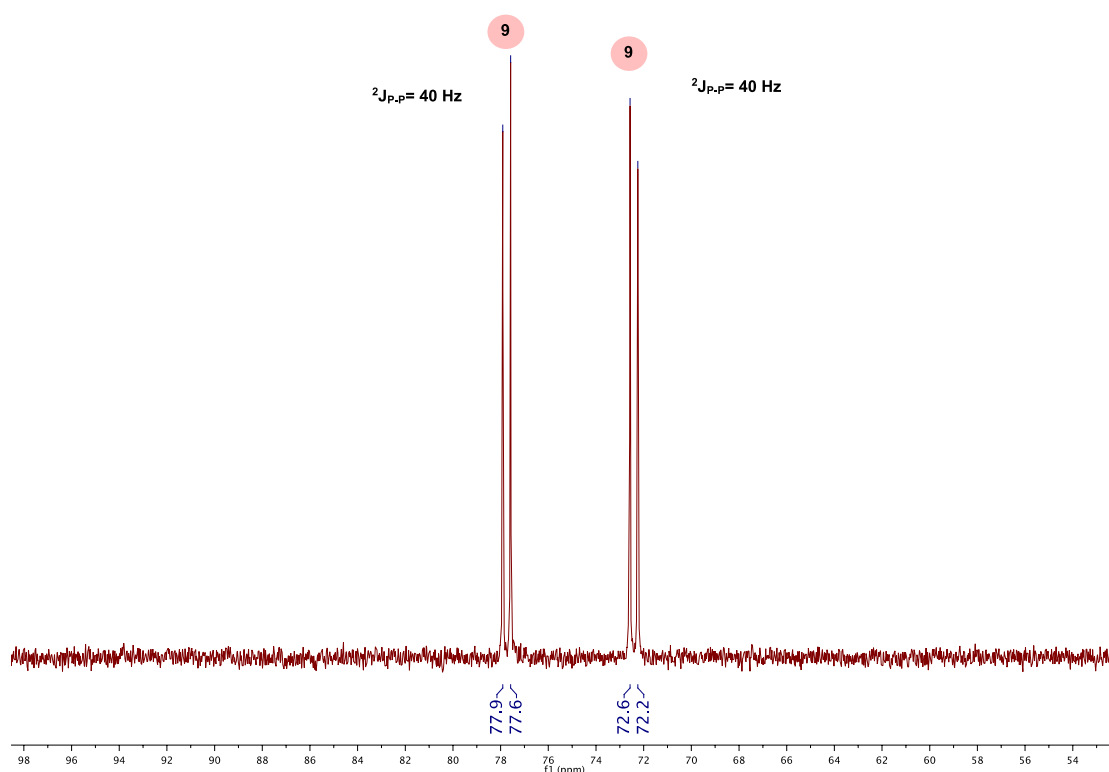

**Spectrum S5.**  $^{31}\text{P}\{^1\text{H}\}$ -NMR spectrum of pure complex (9).

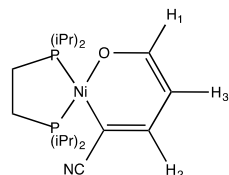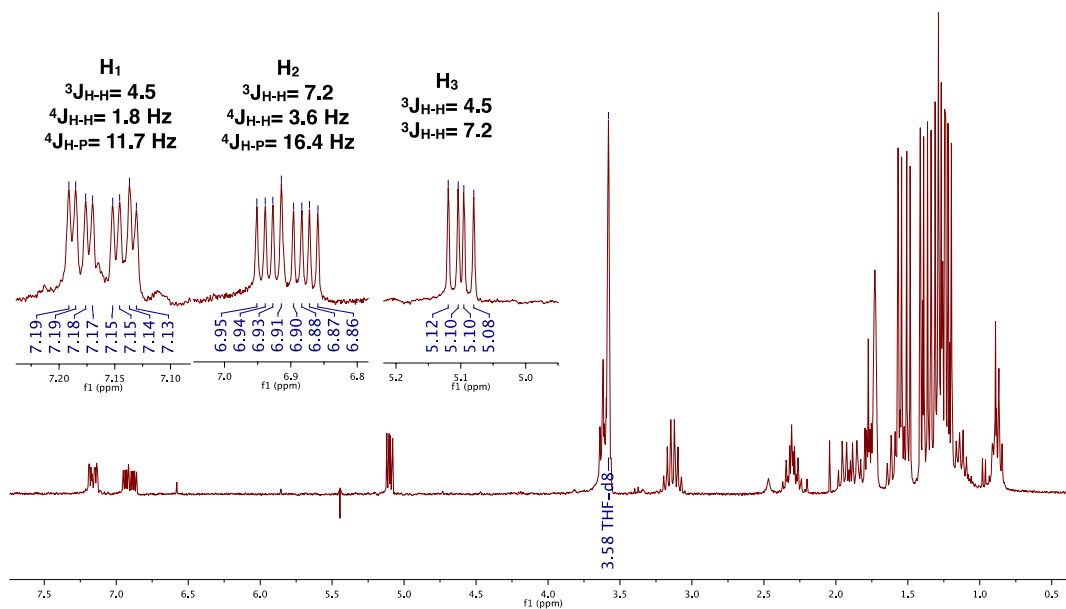

**Spectrum S6.** <sup>1</sup>H-NMR spectrum of pure complex (9).

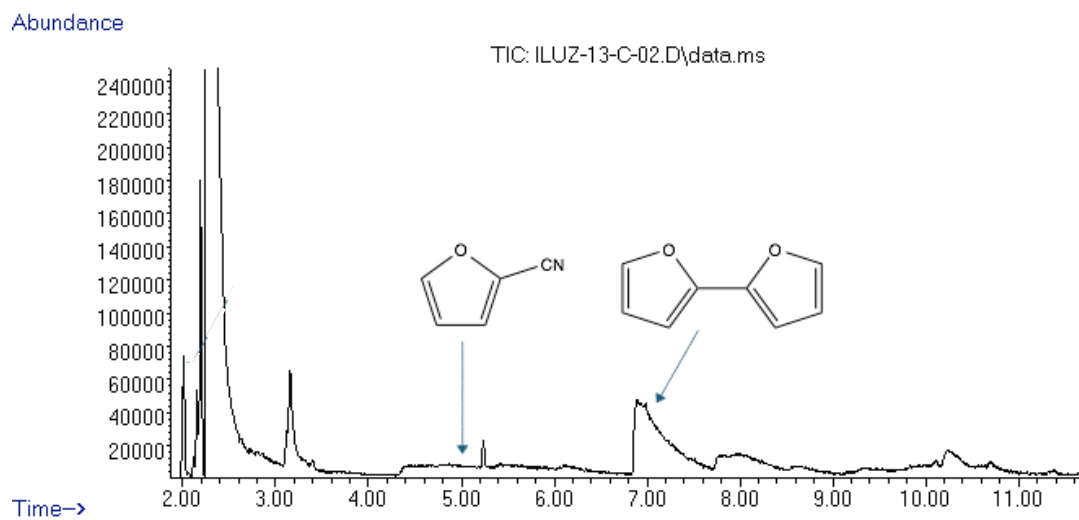

**Chromatogram S2.** Chromatogram of thermolysis of complex (7) after 4 hours at 100 °C.

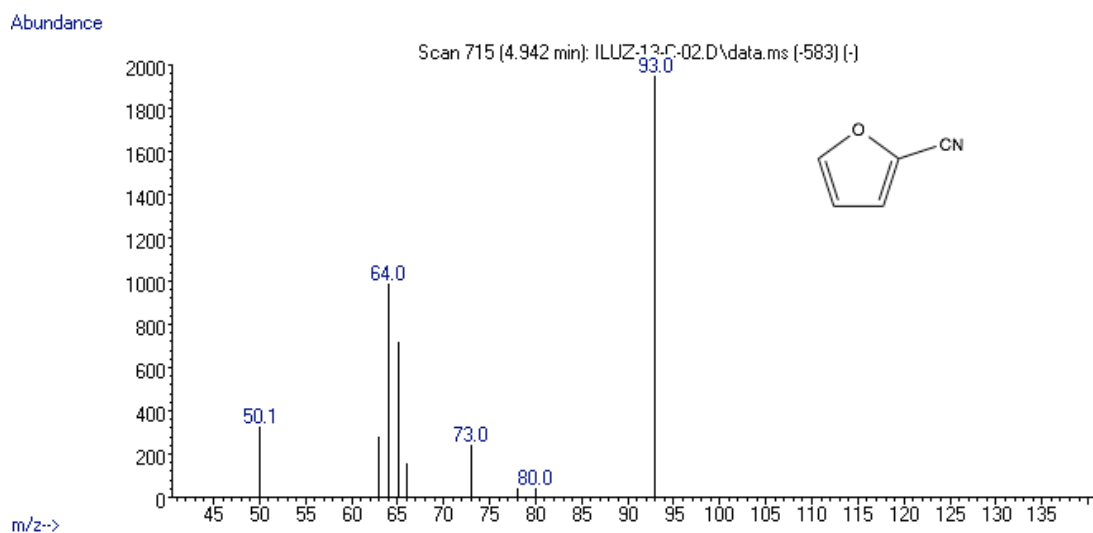

**Spectrum S7.** Mass spectrum corresponding to **2-FN**, obtained from thermolysis of complex **(7)** after 4 hours at 100 °C

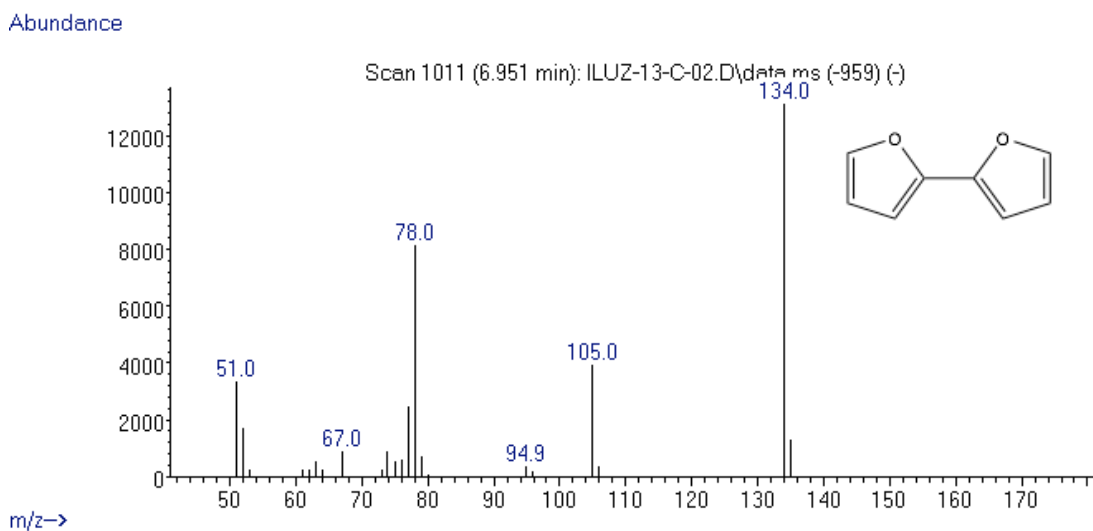

**Spectrum S8.** Mass spectrum corresponding to **(5)**, obtained from thermolysis of complex **(7)** after 4 hours at 100 °C.

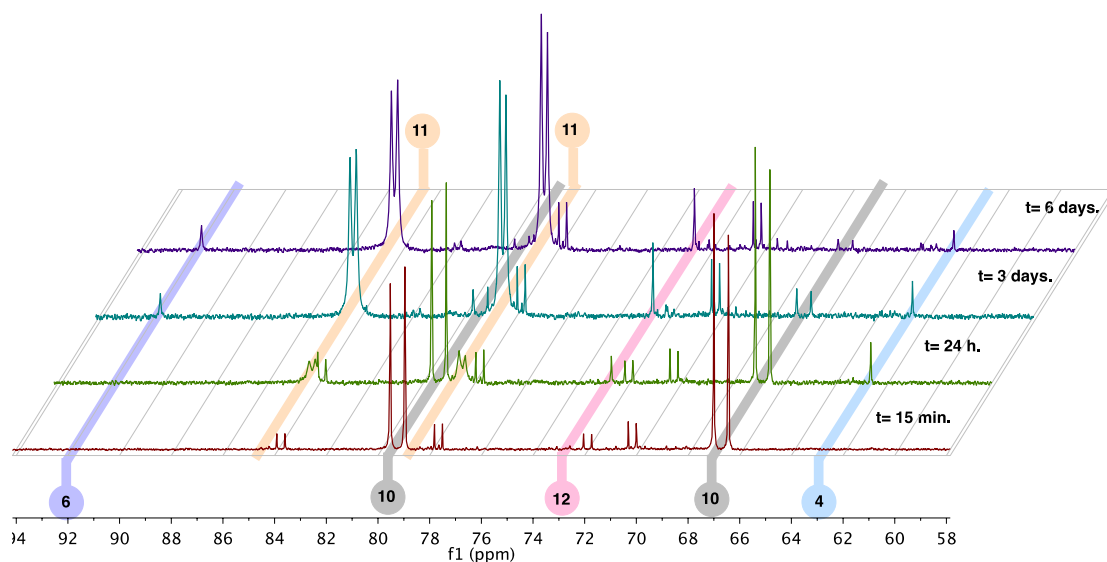

**Figure S7.**  $^{31}\text{P}\{^1\text{H}\}$ -NMR following up of reaction between complex (1) and 3-FN by 6 days at room temperature in  $\text{THF-d}_8$ .

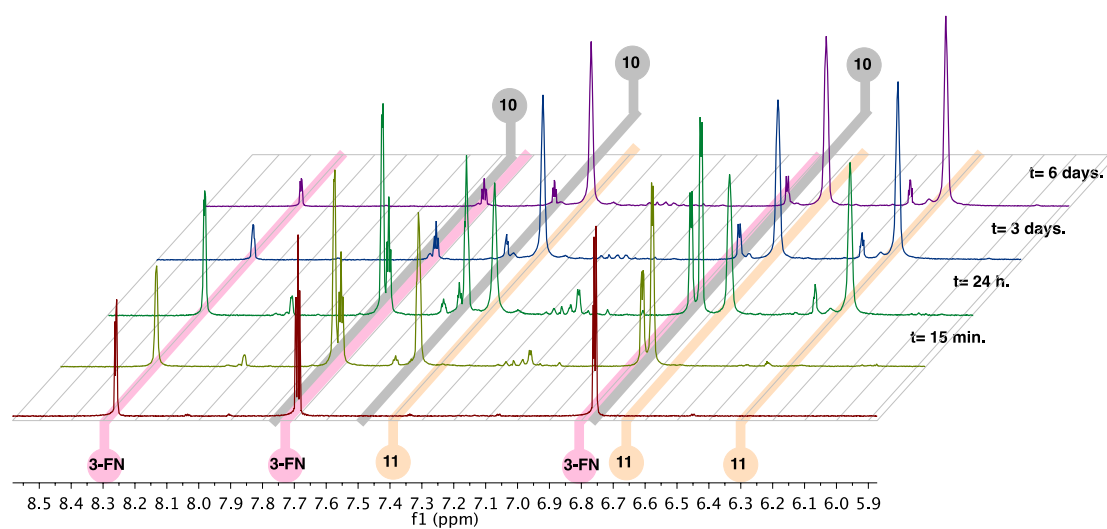

**Figure S8.**  $^1\text{H}$ -NMR following up of reaction between complex (1) and 3-FN by 6 days at room temperature in  $\text{THF-d}_8$ .

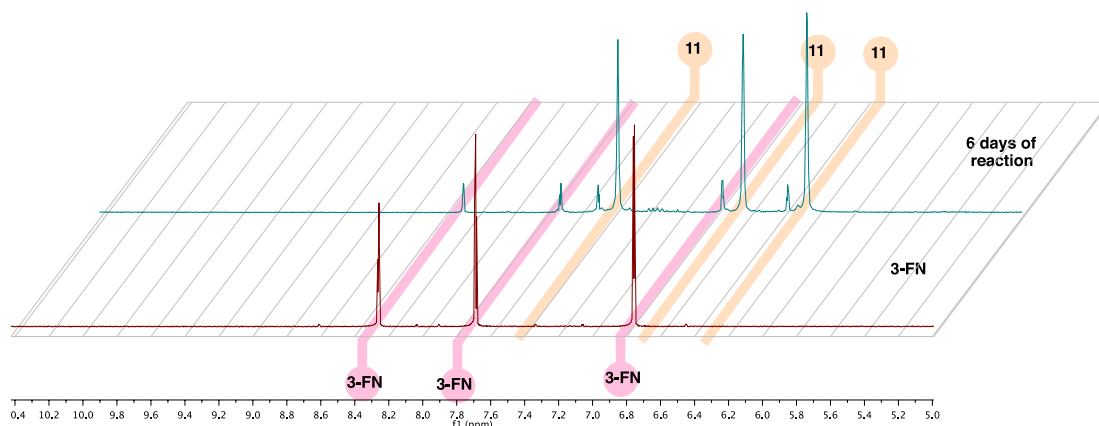

**Figure S9.** Comparison between  $^1\text{H}$ -NMR spectrum of **3-FN** and reaction solution after 6 days of reaction at room temperature by in  $\text{THF-d}_8$ .

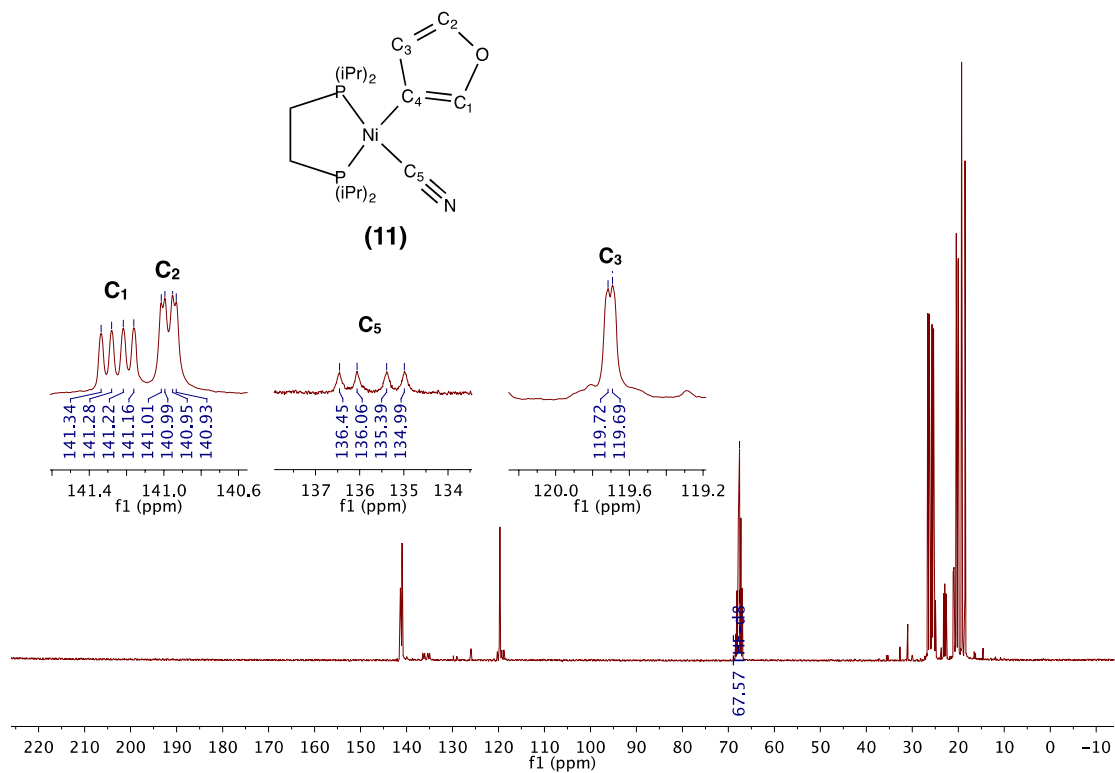

**Spectrum S9.**  $^{13}\text{C}\{^1\text{H}\}$ -NMR spectrum of complex **(11)** in  $\text{THF-d}_8$  at room temperature. Signals assigned to heteroaromatic carbons and nitrile carbon.

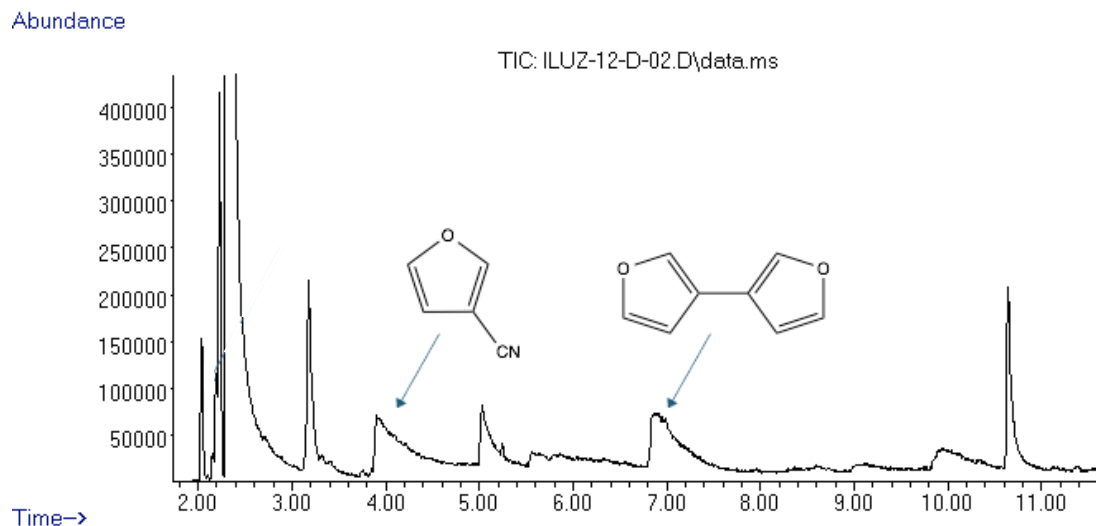

**Chromatogram S3.** Chromatogram of thermolysis of complex **(11)** after 4 hours at 100 °C.

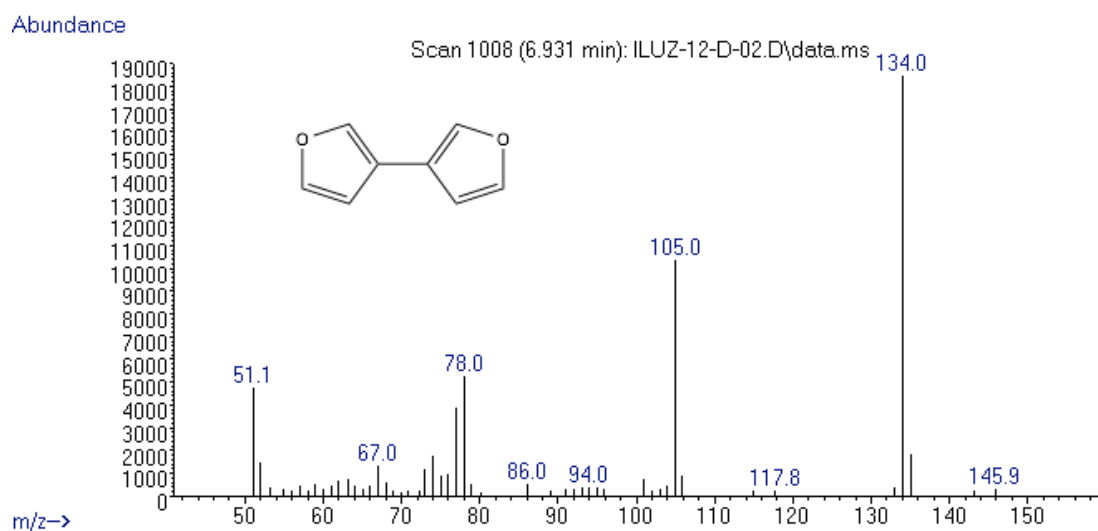

**Spectrum S10.** Mass spectrum corresponding to **(13)**, obtained from thermolysis of complex **(11)** after 4 hours at 100 °C.

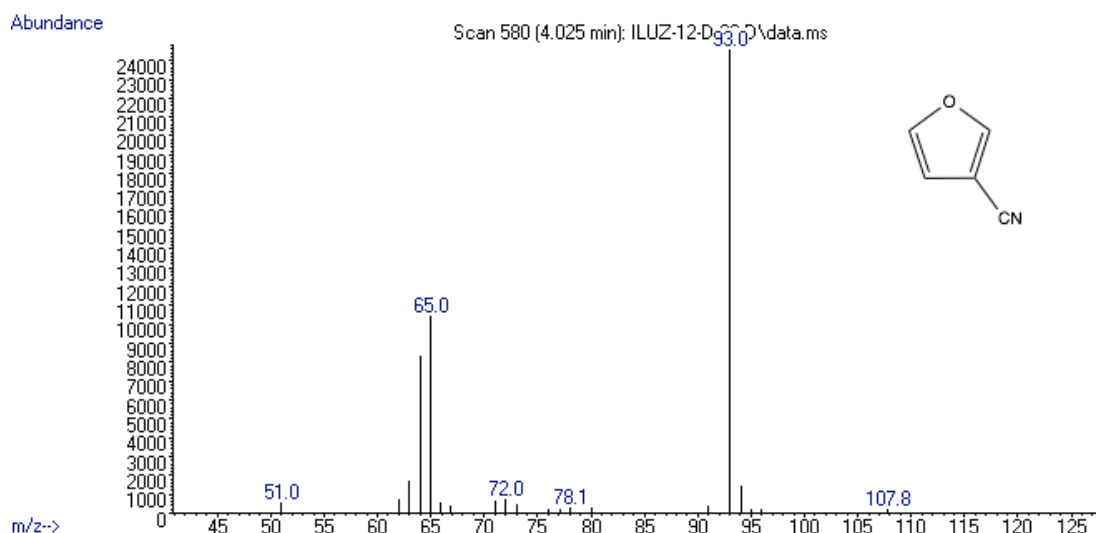

**Spectrum S11.** Mass spectrum corresponding to **3-FN**, obtained from thermolysis of complex (**11**) after 4 hours at 100 °C.

### Cristallographic data for complex (7).

**Table S1.** Crystal data and structure refinement for complex (7).

|                                 |                                                       |                   |
|---------------------------------|-------------------------------------------------------|-------------------|
| Identification code             | 7                                                     |                   |
| Empirical formula               | C <sub>19</sub> H <sub>35</sub> N Ni O P <sub>2</sub> |                   |
| Formula weight                  | 414.13                                                |                   |
| Temperature                     | 130(2) K                                              |                   |
| Wavelength                      | 0.71073 Å                                             |                   |
| Crystal system                  | Monoclinic                                            |                   |
| Space group                     | P 2 <sub>1</sub> /n                                   |                   |
| Unit cell dimensions            | a = 10.9347(15) Å                                     | α = 90°.          |
|                                 | b = 14.4261(14) Å                                     | β = 107.794(13)°. |
|                                 | c = 13.9266(16) Å                                     | γ = 90°.          |
| Volume                          | 2091.8(4) Å <sup>3</sup>                              |                   |
| Z                               | 4                                                     |                   |
| Density (calculated)            | 1.315 Mg/m <sup>3</sup>                               |                   |
| Absorption coefficient          | 1.087 mm <sup>-1</sup>                                |                   |
| F(000)                          | 888                                                   |                   |
| Crystal size                    | 0.490 x 0.400 x 0.330 mm <sup>3</sup>                 |                   |
| Theta range for data collection | 3.436 to 29.582°.                                     |                   |
| Index ranges                    | -10 ≤ h ≤ 13, -18 ≤ k ≤ 19, -18 ≤ l ≤ 19              |                   |

|                                         |                                             |  |
|-----------------------------------------|---------------------------------------------|--|
| <b>Reflections collected</b>            | 10578                                       |  |
| <b>Independent reflections</b>          | 4940 [R(int) = 0.0366]                      |  |
| <b>Completeness to theta = 25.242°</b>  | 99.4 %                                      |  |
| <b>Refinement method</b>                | Full-matrix least-squares on F <sup>2</sup> |  |
| <b>Data / restraints / parameters</b>   | 4940 / 0 / 225                              |  |
| <b>Goodness-of-fit on F<sup>2</sup></b> | 1.078                                       |  |
| <b>Final R indices [I&gt;2sigma(I)]</b> | R1 = 0.0428, wR2 = 0.0800                   |  |
| <b>R indices (all data)</b>             | R1 = 0.0765, wR2 = 0.0939                   |  |
| <b>Extinction coefficient</b>           | n/a                                         |  |
| <b>Largest diff. peak and hole</b>      | 0.645 and -0.463 e.Å <sup>-3</sup>          |  |

**Table S2.** Atomic coordinates ( x 10<sup>4</sup>) and equivalent isotropic displacement parameters (Å<sup>2</sup>x 10<sup>3</sup>) for **7**. U(eq) is defined as one third of the trace of the orthogonalized U<sub>ij</sub> tensor.

|              | <b>x</b> | <b>y</b> | <b>Z</b> | <b>U(eq)</b> |
|--------------|----------|----------|----------|--------------|
| <b>C(1)</b>  | 873(3)   | 8191(2)  | 6028(2)  | 26(1)        |
| <b>C(2)</b>  | 2056(3)  | 8366(2)  | 5672(2)  | 26(1)        |
| <b>C(3)</b>  | 2815(3)  | 6659(2)  | 4925(2)  | 29(1)        |
| <b>C(4)</b>  | 1445(3)  | 6293(2)  | 4706(2)  | 36(1)        |
| <b>C(5)</b>  | 3745(4)  | 5857(2)  | 5004(3)  | 46(1)        |
| <b>C(6)</b>  | 4752(3)  | 7987(2)  | 6010(2)  | 27(1)        |
| <b>C(7)</b>  | 5392(3)  | 8495(2)  | 6995(2)  | 38(1)        |
| <b>C(8)</b>  | 4584(3)  | 8628(2)  | 5102(2)  | 36(1)        |
| <b>C(9)</b>  | 1583(3)  | 8542(2)  | 8185(2)  | 25(1)        |
| <b>C(10)</b> | 2782(3)  | 9095(2)  | 8223(2)  | 35(1)        |
| <b>C(11)</b> | 1652(4)  | 8188(2)  | 9229(2)  | 42(1)        |
| <b>C(12)</b> | -116(3)  | 6992(2)  | 7306(2)  | 26(1)        |
| <b>C(13)</b> | -366(3)  | 6143(2)  | 6611(3)  | 37(1)        |
| <b>C(14)</b> | -1290(3) | 7622(2)  | 7093(3)  | 38(1)        |
| <b>C(15)</b> | 4648(3)  | 6100(2)  | 7748(2)  | 26(1)        |
| <b>C(16)</b> | 5223(3)  | 5526(2)  | 8525(2)  | 26(1)        |
| <b>C(17)</b> | 6413(3)  | 5211(2)  | 8436(2)  | 30(1)        |
| <b>C(18)</b> | 6521(3)  | 5599(2)  | 7607(3)  | 44(1)        |
| <b>C(19)</b> | 2698(3)  | 6188(2)  | 8508(2)  | 30(1)        |



|              |         |         |         |       |
|--------------|---------|---------|---------|-------|
| <b>O(1)</b>  | 5483(2) | 6144(2) | 7158(2) | 50(1) |
| <b>Ni(1)</b> | 3078(1) | 6778(1) | 7425(1) | 21(1) |
| <b>P(1)</b>  | 3243(1) | 7427(1) | 6044(1) | 21(1) |
| <b>P(2)</b>  | 1341(1) | 7603(1) | 7248(1) | 21(1) |
| <b>N(1)</b>  | 2399(3) | 5816(2) | 9127(2) | 45(1) |

**Table S3.** Bond lengths [Å] and angles [°] for **7**.

|                   |                 |
|-------------------|-----------------|
| <b>C(1)-C(2)</b>  | <b>1.541(4)</b> |
| <b>C(1)-P(2)</b>  | 1.827(3)        |
| <b>C(1)-H(1A)</b> | 0.9900          |
| <b>C(1)-H(1B)</b> | 0.9900          |
| <b>C(2)-P(1)</b>  | 1.837(3)        |
| <b>C(2)-H(2A)</b> | 0.9900          |
| <b>C(2)-H(2B)</b> | 0.9900          |
| <b>C(3)-C(5)</b>  | 1.522(4)        |
| <b>C(3)-C(4)</b>  | 1.528(4)        |
| <b>C(3)-P(1)</b>  | 1.852(3)        |
| <b>C(3)-H(3)</b>  | 1.0000          |
| <b>C(4)-H(4A)</b> | 0.9800          |
| <b>C(4)-H(4B)</b> | 0.9800          |
| <b>C(4)-H(4C)</b> | 0.9800          |
| <b>C(5)-H(5A)</b> | 0.9800          |
| <b>C(5)-H(5B)</b> | 0.9800          |
| <b>C(5)-H(5C)</b> | 0.9800          |
| <b>C(6)-C(7)</b>  | 1.525(4)        |
| <b>C(6)-C(8)</b>  | 1.531(4)        |
| <b>C(6)-P(1)</b>  | 1.850(3)        |
| <b>C(6)-H(6)</b>  | 1.0000          |
| <b>C(7)-H(7A)</b> | 0.9800          |
| <b>C(7)-H(7B)</b> | 0.9800          |
| <b>C(7)-H(7C)</b> | 0.9800          |
| <b>C(8)-H(8A)</b> | 0.9800          |
| <b>C(8)-H(8B)</b> | 0.9800          |
| <b>C(8)-H(8C)</b> | 0.9800          |
| <b>C(9)-C(11)</b> | 1.521(4)        |

|                        |            |
|------------------------|------------|
| <b>C(9)-C(10)</b>      | 1.522(4)   |
| <b>C(9)-P(2)</b>       | 1.842(3)   |
| <b>C(9)-H(9)</b>       | 1.0000     |
| <b>C(10)-H(10A)</b>    | 0.9800     |
| <b>C(10)-H(10B)</b>    | 0.9800     |
| <b>C(10)-H(10C)</b>    | 0.9800     |
| <b>C(11)-H(11A)</b>    | 0.9800     |
| <b>C(11)-H(11B)</b>    | 0.9800     |
| <b>C(11)-H(11C)</b>    | 0.9800     |
| <b>C(12)-C(14)</b>     | 1.527(4)   |
| <b>C(12)-C(13)</b>     | 1.533(4)   |
| <b>C(12)-P(2)</b>      | 1.844(3)   |
| <b>C(12)-H(12)</b>     | 1.0000     |
| <b>C(13)-H(13A)</b>    | 0.9800     |
| <b>C(13)-H(13B)</b>    | 0.9800     |
| <b>C(13)-H(13C)</b>    | 0.9800     |
| <b>C(14)-H(14A)</b>    | 0.9800     |
| <b>C(14)-H(14B)</b>    | 0.9800     |
| <b>C(14)-H(14C)</b>    | 0.9800     |
| <b>C(15)-C(16)</b>     | 1.355(4)   |
| <b>C(15)-O(1)</b>      | 1.404(3)   |
| <b>C(15)-Ni(1)</b>     | 1.906(3)   |
| <b>C(16)-C(17)</b>     | 1.419(4)   |
| <b>C(16)-H(16)</b>     | 0.9500     |
| <b>C(17)-C(18)</b>     | 1.321(4)   |
| <b>C(17)-H(17)</b>     | 0.9500     |
| <b>C(18)-O(1)</b>      | 1.365(4)   |
| <b>C(18)-H(18)</b>     | 0.9500     |
| <b>C(19)-N(1)</b>      | 1.145(4)   |
| <b>C(19)-Ni(1)</b>     | 1.885(3)   |
| <b>Ni(1)-P(2)</b>      | 2.1910(8)  |
| <b>Ni(1)-P(1)</b>      | 2.1964(8)  |
| <b>C(2)-C(1)-P(2)</b>  | 110.59(19) |
| <b>C(2)-C(1)-H(1A)</b> | 109.5      |
| <b>P(2)-C(1)-H(1A)</b> | 109.5      |
| <b>C(2)-C(1)-H(1B)</b> | 109.5      |
| <b>P(2)-C(1)-H(1B)</b> | 109.5      |

|                         |            |
|-------------------------|------------|
| <b>H(1A)-C(1)-H(1B)</b> | 108.1      |
| <b>C(1)-C(2)-P(1)</b>   | 112.23(19) |
| <b>C(1)-C(2)-H(2A)</b>  | 109.2      |
| <b>P(1)-C(2)-H(2A)</b>  | 109.2      |
| <b>C(1)-C(2)-H(2B)</b>  | 109.2      |
| <b>P(1)-C(2)-H(2B)</b>  | 109.2      |
| <b>H(2A)-C(2)-H(2B)</b> | 107.9      |
| <b>C(5)-C(3)-C(4)</b>   | 110.1(3)   |
| <b>C(5)-C(3)-P(1)</b>   | 113.7(2)   |
| <b>C(4)-C(3)-P(1)</b>   | 110.8(2)   |
| <b>C(5)-C(3)-H(3)</b>   | 107.3      |
| <b>C(4)-C(3)-H(3)</b>   | 107.3      |
| <b>P(1)-C(3)-H(3)</b>   | 107.3      |
| <b>C(3)-C(4)-H(4A)</b>  | 109.5      |
| <b>C(3)-C(4)-H(4B)</b>  | 109.5      |
| <b>H(4A)-C(4)-H(4B)</b> | 109.5      |
| <b>C(3)-C(4)-H(4C)</b>  | 109.5      |
| <b>H(4A)-C(4)-H(4C)</b> | 109.5      |
| <b>H(4B)-C(4)-H(4C)</b> | 109.5      |
| <b>C(3)-C(5)-H(5A)</b>  | 109.5      |
| <b>C(3)-C(5)-H(5B)</b>  | 109.5      |
| <b>H(5A)-C(5)-H(5B)</b> | 109.5      |
| <b>C(3)-C(5)-H(5C)</b>  | 109.5      |
| <b>H(5A)-C(5)-H(5C)</b> | 109.5      |
| <b>H(5B)-C(5)-H(5C)</b> | 109.5      |
| <b>C(7)-C(6)-C(8)</b>   | 111.0(3)   |
| <b>C(7)-C(6)-P(1)</b>   | 110.7(2)   |
| <b>C(8)-C(6)-P(1)</b>   | 113.7(2)   |
| <b>C(7)-C(6)-H(6)</b>   | 107.0      |
| <b>C(8)-C(6)-H(6)</b>   | 107.0      |
| <b>P(1)-C(6)-H(6)</b>   | 107.0      |
| <b>C(6)-C(7)-H(7A)</b>  | 109.5      |
| <b>C(6)-C(7)-H(7B)</b>  | 109.5      |
| <b>H(7A)-C(7)-H(7B)</b> | 109.5      |
| <b>C(6)-C(7)-H(7C)</b>  | 109.5      |
| <b>H(7A)-C(7)-H(7C)</b> | 109.5      |
| <b>H(7B)-C(7)-H(7C)</b> | 109.5      |

|                            |          |
|----------------------------|----------|
| <b>C(6)-C(8)-H(8A)</b>     | 109.5    |
| <b>C(6)-C(8)-H(8B)</b>     | 109.5    |
| <b>H(8A)-C(8)-H(8B)</b>    | 109.5    |
| <b>C(6)-C(8)-H(8C)</b>     | 109.5    |
| <b>H(8A)-C(8)-H(8C)</b>    | 109.5    |
| <b>H(8B)-C(8)-H(8C)</b>    | 109.5    |
| <b>C(11)-C(9)-C(10)</b>    | 110.6(3) |
| <b>C(11)-C(9)-P(2)</b>     | 112.7(2) |
| <b>C(10)-C(9)-P(2)</b>     | 110.2(2) |
| <b>C(11)-C(9)-H(9)</b>     | 107.7    |
| <b>C(10)-C(9)-H(9)</b>     | 107.7    |
| <b>P(2)-C(9)-H(9)</b>      | 107.7    |
| <b>C(9)-C(10)-H(10A)</b>   | 109.5    |
| <b>C(9)-C(10)-H(10B)</b>   | 109.5    |
| <b>H(10A)-C(10)-H(10B)</b> | 109.5    |
| <b>C(9)-C(10)-H(10C)</b>   | 109.5    |
| <b>H(10A)-C(10)-H(10C)</b> | 109.5    |
| <b>H(10B)-C(10)-H(10C)</b> | 109.5    |
| <b>C(9)-C(11)-H(11A)</b>   | 109.5    |
| <b>C(9)-C(11)-H(11B)</b>   | 109.5    |
| <b>H(11A)-C(11)-H(11B)</b> | 109.5    |
| <b>C(9)-C(11)-H(11C)</b>   | 109.5    |
| <b>H(11A)-C(11)-H(11C)</b> | 109.5    |
| <b>H(11B)-C(11)-H(11C)</b> | 109.5    |
| <b>C(14)-C(12)-C(13)</b>   | 112.1(3) |
| <b>C(14)-C(12)-P(2)</b>    | 113.1(2) |
| <b>C(13)-C(12)-P(2)</b>    | 110.2(2) |
| <b>C(14)-C(12)-H(12)</b>   | 107.0    |
| <b>C(13)-C(12)-H(12)</b>   | 107.0    |
| <b>P(2)-C(12)-H(12)</b>    | 107.0    |
| <b>C(12)-C(13)-H(13A)</b>  | 109.5    |
| <b>C(12)-C(13)-H(13B)</b>  | 109.5    |
| <b>H(13A)-C(13)-H(13B)</b> | 109.5    |
| <b>C(12)-C(13)-H(13C)</b>  | 109.5    |
| <b>H(13A)-C(13)-H(13C)</b> | 109.5    |
| <b>H(13B)-C(13)-H(13C)</b> | 109.5    |
| <b>C(12)-C(14)-H(14A)</b>  | 109.5    |

|                            |            |
|----------------------------|------------|
| <b>C(12)-C(14)-H(14B)</b>  | 109.5      |
| <b>H(14A)-C(14)-H(14B)</b> | 109.5      |
| <b>C(12)-C(14)-H(14C)</b>  | 109.5      |
| <b>H(14A)-C(14)-H(14C)</b> | 109.5      |
| <b>H(14B)-C(14)-H(14C)</b> | 109.5      |
| <b>C(16)-C(15)-O(1)</b>    | 105.6(3)   |
| <b>C(16)-C(15)-Ni(1)</b>   | 131.8(2)   |
| <b>O(1)-C(15)-Ni(1)</b>    | 122.6(2)   |
| <b>C(15)-C(16)-C(17)</b>   | 109.9(3)   |
| <b>C(15)-C(16)-H(16)</b>   | 125.0      |
| <b>C(17)-C(16)-H(16)</b>   | 125.0      |
| <b>C(18)-C(17)-C(16)</b>   | 105.6(3)   |
| <b>C(18)-C(17)-H(17)</b>   | 127.2      |
| <b>C(16)-C(17)-H(17)</b>   | 127.2      |
| <b>C(17)-C(18)-O(1)</b>    | 111.1(3)   |
| <b>C(17)-C(18)-H(18)</b>   | 124.4      |
| <b>O(1)-C(18)-H(18)</b>    | 124.4      |
| <b>N(1)-C(19)-Ni(1)</b>    | 176.0(3)   |
| <b>C(18)-O(1)-C(15)</b>    | 107.8(2)   |
| <b>C(19)-Ni(1)-C(15)</b>   | 88.98(13)  |
| <b>C(19)-Ni(1)-P(2)</b>    | 86.57(9)   |
| <b>C(15)-Ni(1)-P(2)</b>    | 173.04(9)  |
| <b>C(19)-Ni(1)-P(1)</b>    | 172.07(10) |
| <b>C(15)-Ni(1)-P(1)</b>    | 96.68(9)   |
| <b>P(2)-Ni(1)-P(1)</b>     | 88.28(3)   |
| <b>C(2)-P(1)-C(6)</b>      | 103.28(14) |
| <b>C(2)-P(1)-C(3)</b>      | 103.23(14) |
| <b>C(6)-P(1)-C(3)</b>      | 103.74(13) |
| <b>C(2)-P(1)-Ni(1)</b>     | 108.75(9)  |
| <b>C(6)-P(1)-Ni(1)</b>     | 121.40(10) |
| <b>C(3)-P(1)-Ni(1)</b>     | 114.49(10) |
| <b>C(1)-P(2)-C(9)</b>      | 104.86(14) |
| <b>C(1)-P(2)-C(12)</b>     | 105.25(14) |
| <b>C(9)-P(2)-C(12)</b>     | 105.06(13) |
| <b>C(1)-P(2)-Ni(1)</b>     | 110.09(10) |
| <b>C(9)-P(2)-Ni(1)</b>     | 112.80(10) |
| <b>C(12)-P(2)-Ni(1)</b>    | 117.75(10) |

**Table S4.** Anisotropic displacement parameters ( $\text{\AA}^2 \times 10^3$ ) for **7**. The anisotropic displacement factor exponent takes the form:  $-2\pi^2 [ h^2 a^* 2U^{11} + \dots + 2 h k a^* b^* U^{12} ]$

|              | $U^{11}$ | $U^{22}$ | $U^{33}$ | $U^{23}$ | $U^{13}$ | $U^{12}$ |
|--------------|----------|----------|----------|----------|----------|----------|
| <b>C(1)</b>  | 25(2)    | 24(2)    | 29(2)    | 6(1)     | 7(1)     | 8(1)     |
| <b>C(2)</b>  | 32(2)    | 23(2)    | 25(1)    | 4(1)     | 12(1)    | 5(1)     |
| <b>C(3)</b>  | 41(2)    | 25(2)    | 27(2)    | -5(1)    | 19(1)    | -4(1)    |
| <b>C(4)</b>  | 39(2)    | 36(2)    | 33(2)    | -8(2)    | 10(1)    | -5(2)    |
| <b>C(5)</b>  | 48(2)    | 36(2)    | 65(2)    | -18(2)   | 32(2)    | -6(2)    |
| <b>C(6)</b>  | 27(2)    | 27(2)    | 31(2)    | -1(1)    | 16(1)    | -2(1)    |
| <b>C(7)</b>  | 32(2)    | 47(2)    | 39(2)    | -13(2)   | 16(2)    | -12(2)   |
| <b>C(8)</b>  | 44(2)    | 31(2)    | 43(2)    | 9(2)     | 27(2)    | -1(2)    |
| <b>C(9)</b>  | 27(2)    | 23(1)    | 27(2)    | -2(1)    | 13(1)    | 0(1)     |
| <b>C(10)</b> | 34(2)    | 34(2)    | 41(2)    | -10(2)   | 17(2)    | -9(2)    |
| <b>C(11)</b> | 63(2)    | 35(2)    | 34(2)    | -5(2)    | 25(2)    | -4(2)    |
| <b>C(12)</b> | 23(2)    | 25(2)    | 35(2)    | -1(1)    | 15(1)    | -1(1)    |
| <b>C(13)</b> | 31(2)    | 28(2)    | 57(2)    | -11(2)   | 23(2)    | -9(1)    |
| <b>C(14)</b> | 25(2)    | 33(2)    | 60(2)    | -13(2)   | 20(2)    | -2(1)    |
| <b>C(15)</b> | 27(2)    | 24(2)    | 30(2)    | 2(1)     | 14(1)    | 2(1)     |
| <b>C(16)</b> | 26(2)    | 25(2)    | 25(2)    | -1(1)    | 5(1)     | 1(1)     |
| <b>C(17)</b> | 26(2)    | 25(2)    | 36(2)    | 0(1)     | 4(1)     | 4(1)     |
| <b>C(18)</b> | 34(2)    | 48(2)    | 58(2)    | 14(2)    | 27(2)    | 18(2)    |
| <b>C(19)</b> | 32(2)    | 29(2)    | 31(2)    | 7(1)     | 15(1)    | 7(1)     |
| <b>O(1)</b>  | 46(2)    | 62(2)    | 57(2)    | 30(1)    | 37(1)    | 28(1)    |
| <b>Ni(1)</b> | 23(1)    | 21(1)    | 22(1)    | 4(1)     | 11(1)    | 4(1)     |
| <b>P(1)</b>  | 25(1)    | 20(1)    | 22(1)    | 2(1)     | 11(1)    | 2(1)     |
| <b>P(2)</b>  | 21(1)    | 19(1)    | 24(1)    | 1(1)     | 10(1)    | 1(1)     |
| <b>N(1)</b>  | 54(2)    | 44(2)    | 49(2)    | 19(2)    | 33(2)    | 20(2)    |

**Table S5.** Torsion angles [ $^\circ$ ] for **7**.

|                                |                |
|--------------------------------|----------------|
| <b>P(2)-C(1)-C(2)-P(1)</b>     | <b>34.9(3)</b> |
| <b>O(1)-C(15)-C(16)-C(17)</b>  | 0.3(3)         |
| <b>Ni(1)-C(15)-C(16)-C(17)</b> | -178.4(2)      |
| <b>C(15)-C(16)-C(17)-C(18)</b> | -0.3(4)        |

|                               |             |
|-------------------------------|-------------|
| <b>C(16)-C(17)-C(18)-O(1)</b> | 0.1(4)      |
| <b>C(17)-C(18)-O(1)-C(15)</b> | 0.1(4)      |
| <b>C(16)-C(15)-O(1)-C(18)</b> | -0.3(4)     |
| <b>Ni(1)-C(15)-O(1)-C(18)</b> | 178.6(2)    |
| <b>C(1)-C(2)-P(1)-C(6)</b>    | -158.0(2)   |
| <b>C(1)-C(2)-P(1)-C(3)</b>    | 94.1(2)     |
| <b>C(1)-C(2)-P(1)-Ni(1)</b>   | -27.8(2)    |
| <b>C(7)-C(6)-P(1)-C(2)</b>    | 84.2(2)     |
| <b>C(8)-C(6)-P(1)-C(2)</b>    | -41.6(2)    |
| <b>C(7)-C(6)-P(1)-C(3)</b>    | -168.4(2)   |
| <b>C(8)-C(6)-P(1)-C(3)</b>    | 65.8(2)     |
| <b>C(7)-C(6)-P(1)-Ni(1)</b>   | -37.9(3)    |
| <b>C(8)-C(6)-P(1)-Ni(1)</b>   | -163.70(17) |
| <b>C(5)-C(3)-P(1)-C(2)</b>    | 174.8(2)    |
| <b>C(4)-C(3)-P(1)-C(2)</b>    | -60.6(2)    |
| <b>C(5)-C(3)-P(1)-C(6)</b>    | 67.3(2)     |
| <b>C(4)-C(3)-P(1)-C(6)</b>    | -168.1(2)   |
| <b>C(5)-C(3)-P(1)-Ni(1)</b>   | -67.2(2)    |
| <b>C(4)-C(3)-P(1)-Ni(1)</b>   | 57.5(2)     |
| <b>C(2)-C(1)-P(2)-C(9)</b>    | 94.1(2)     |
| <b>C(2)-C(1)-P(2)-C(12)</b>   | -155.4(2)   |
| <b>C(2)-C(1)-P(2)-Ni(1)</b>   | -27.5(2)    |
| <b>C(11)-C(9)-P(2)-C(1)</b>   | 165.7(2)    |
| <b>C(10)-C(9)-P(2)-C(1)</b>   | -70.2(2)    |
| <b>C(11)-C(9)-P(2)-C(12)</b>  | 55.0(3)     |
| <b>C(10)-C(9)-P(2)-C(12)</b>  | 179.1(2)    |
| <b>C(11)-C(9)-P(2)-Ni(1)</b>  | -74.5(2)    |
| <b>C(10)-C(9)-P(2)-Ni(1)</b>  | 49.6(2)     |
| <b>C(14)-C(12)-P(2)-C(1)</b>  | -52.5(2)    |
| <b>C(13)-C(12)-P(2)-C(1)</b>  | 73.9(2)     |
| <b>C(14)-C(12)-P(2)-C(9)</b>  | 57.9(2)     |
| <b>C(13)-C(12)-P(2)-C(9)</b>  | -175.7(2)   |
| <b>C(14)-C(12)-P(2)-Ni(1)</b> | -175.56(18) |
| <b>C(13)-C(12)-P(2)-Ni(1)</b> | -49.2(2)    |

**Table S6.** Hydrogen bonds for **7** [ $\text{\AA}$  and  $^\circ$ ].

| D-H...A             | d(D-H) | d(H...A) | d(D...A) | $\angle(\text{DHA})$ |
|---------------------|--------|----------|----------|----------------------|
| C(6)-H(6)...O(1)    | 1.00   | 2.53     | 3.080(4) | 114.3                |
| C(2)-H(2A)...N(1)#1 | 0.99   | 2.69     | 3.580(4) | 149.8                |
| C(2)-H(2A)...N(1)#1 | 0.99   | 2.69     | 3.580(4) | 149.8                |
| C(6)-H(6)...O(1)    | 1.00   | 2.53     | 3.080(4) | 114.3                |

Symmetry transformations used to generate equivalent atoms:

#1  $-x+1/2, y+1/2, -z+3/2$

### Cristalographic data for complex (11).

**Table S7.** Crystal data and structure refinement for complex (11).

|                                         |                                                                        |                              |
|-----------------------------------------|------------------------------------------------------------------------|------------------------------|
| Identification code                     | <b>11</b>                                                              |                              |
| Empirical formula                       | C <sub>19</sub> H <sub>35</sub> N Ni O P <sub>2</sub>                  |                              |
| Formula weight                          | 414.13                                                                 |                              |
| Temperature                             | 130(2) K                                                               |                              |
| Wavelength                              | 0.71073 $\text{\AA}$                                                   |                              |
| Crystal system                          | Monoclinic                                                             |                              |
| Space group                             | P 2 <sub>1</sub> /n                                                    |                              |
| Unit cell dimensions                    | a = 15.6451(9) $\text{\AA}$                                            | $\alpha = 90^\circ$ .        |
|                                         | b = 14.6989(13) $\text{\AA}$                                           | $\beta = 103.432(6)^\circ$ . |
|                                         | c = 19.3297(15) $\text{\AA}$                                           | $\gamma = 90^\circ$ .        |
| Volume                                  | 4323.6(6) $\text{\AA}^3$                                               |                              |
| Z                                       | 8                                                                      |                              |
| Density (calculated)                    | 1.272 Mg/m <sup>3</sup>                                                |                              |
| Absorption coefficient                  | 1.051 mm <sup>-1</sup>                                                 |                              |
| F(000)                                  | 1776                                                                   |                              |
| Crystal size                            | 0.450 x 0.280 x 0.100 mm <sup>3</sup>                                  |                              |
| Theta range for data collection         | 3.519 to 29.434 $^\circ$ .                                             |                              |
| Index ranges                            | -19 $\leq$ h $\leq$ 17, -14 $\leq$ k $\leq$ 19, -17 $\leq$ l $\leq$ 26 |                              |
| Reflections collected                   | 18841                                                                  |                              |
| Independent reflections                 | 9914 [R(int) = 0.0401]                                                 |                              |
| Completeness to theta = 25.242 $^\circ$ | 99.7 %                                                                 |                              |



|                                         |                                             |  |
|-----------------------------------------|---------------------------------------------|--|
| <b>Refinement method</b>                | Full-matrix least-squares on F <sup>2</sup> |  |
| <b>Data / restraints / parameters</b>   | 9914 / 0 / 449                              |  |
| <b>Goodness-of-fit on F<sup>2</sup></b> | 1.089                                       |  |
| <b>Final R indices [I&gt;2sigma(I)]</b> | R1 = 0.0591, wR2 = 0.1437                   |  |
| <b>R indices (all data)</b>             | R1 = 0.1064, wR2 = 0.1738                   |  |
| <b>Extinction coefficient</b>           | n/a                                         |  |
| <b>Largest diff. peak and hole</b>      | 1.053 and -0.788 e.Å <sup>-3</sup>          |  |

**Table S8.** Atomic coordinates ( $\times 10^4$ ) and equivalent isotropic displacement parameters ( $\text{\AA}^2 \times 10^3$ ) for **11**.  $U(\text{eq})$  is defined as one third of the trace of the orthogonalized  $U_{ij}$  tensor.

|              | <b>x</b> | <b>y</b> | <b>z</b> | <b>U(eq)</b> |
|--------------|----------|----------|----------|--------------|
| <b>C(1)</b>  | 8825(3)  | 4758(3)  | 3182(2)  | 27(1)        |
| <b>C(2)</b>  | 8742(3)  | 4734(3)  | 2375(2)  | 24(1)        |
| <b>C(3)</b>  | 6915(3)  | 4818(3)  | 1573(2)  | 27(1)        |
| <b>C(4)</b>  | 6581(3)  | 5220(4)  | 2189(3)  | 42(1)        |
| <b>C(5)</b>  | 6154(3)  | 4417(4)  | 1011(3)  | 38(1)        |
| <b>C(6)</b>  | 8175(3)  | 3640(3)  | 1112(2)  | 25(1)        |
| <b>C(7)</b>  | 8846(3)  | 2872(3)  | 1289(3)  | 34(1)        |
| <b>C(8)</b>  | 8526(3)  | 4428(4)  | 740(2)   | 36(1)        |
| <b>C(9)</b>  | 8108(3)  | 3954(3)  | 4313(2)  | 29(1)        |
| <b>C(10)</b> | 7209(3)  | 4430(4)  | 4099(3)  | 41(1)        |
| <b>C(11)</b> | 8778(3)  | 4512(4)  | 4851(2)  | 38(1)        |
| <b>C(12)</b> | 9540(3)  | 3041(3)  | 3852(2)  | 26(1)        |
| <b>C(13)</b> | 9922(3)  | 2721(4)  | 3238(2)  | 34(1)        |
| <b>C(14)</b> | 9428(3)  | 2242(3)  | 4332(2)  | 34(1)        |
| <b>C(15)</b> | 6639(3)  | 2417(3)  | 1910(2)  | 26(1)        |
| <b>C(16)</b> | 5735(3)  | 2323(3)  | 1964(3)  | 32(1)        |
| <b>C(17)</b> | 5272(3)  | 1941(4)  | 1364(3)  | 36(1)        |
| <b>C(18)</b> | 6628(3)  | 2063(3)  | 1271(2)  | 32(1)        |
| <b>C(19)</b> | 7226(3)  | 2209(3)  | 3326(2)  | 28(1)        |
| <b>N(1)</b>  | 7007(3)  | 1776(3)  | 3756(2)  | 37(1)        |
| <b>Ni(1)</b> | 7536(1)  | 2990(1)  | 2652(1)  | 22(1)        |
| <b>P(2)</b>  | 8495(1)  | 3663(1)  | 3508(1)  | 23(1)        |

|              |         |         |         |       |
|--------------|---------|---------|---------|-------|
| <b>P(1)</b>  | 7818(1) | 4004(1) | 1914(1) | 21(1) |
| <b>O(1)</b>  | 5799(2) | 1756(2) | 910(2)  | 37(1) |
| <b>C(20)</b> | 6331(3) | 6402(3) | 7748(2) | 26(1) |
| <b>C(21)</b> | 6295(3) | 6457(3) | 6938(2) | 31(1) |
| <b>C(22)</b> | 7128(3) | 5694(3) | 5855(2) | 29(1) |
| <b>C(23)</b> | 7986(3) | 6227(4) | 6093(3) | 38(1) |
| <b>C(24)</b> | 6482(4) | 6186(4) | 5258(3) | 41(1) |
| <b>C(25)</b> | 5645(3) | 4759(3) | 6218(2) | 32(1) |
| <b>C(26)</b> | 5835(3) | 3933(4) | 5785(3) | 38(1) |
| <b>C(27)</b> | 5175(3) | 4466(4) | 6786(3) | 47(1) |
| <b>C(28)</b> | 8141(3) | 6513(3) | 8582(2) | 28(1) |
| <b>C(29)</b> | 8538(3) | 6875(4) | 7980(3) | 42(1) |
| <b>C(30)</b> | 8855(3) | 6128(4) | 9198(3) | 39(1) |
| <b>C(31)</b> | 6899(3) | 5276(3) | 9002(2) | 27(1) |
| <b>C(32)</b> | 6569(3) | 6038(4) | 9415(2) | 37(1) |
| <b>C(33)</b> | 6216(3) | 4516(3) | 8793(3) | 36(1) |
| <b>C(34)</b> | 8454(3) | 4095(3) | 8226(2) | 26(1) |
| <b>C(35)</b> | 9366(3) | 3994(3) | 8198(3) | 33(1) |
| <b>C(36)</b> | 9786(3) | 3546(4) | 8786(3) | 38(1) |
| <b>C(37)</b> | 8410(3) | 3672(3) | 8826(2) | 31(1) |
| <b>C(38)</b> | 7923(3) | 3937(3) | 6809(2) | 28(1) |
| <b>N(2)</b>  | 8134(3) | 3498(3) | 6373(2) | 36(1) |
| <b>Ni(2)</b> | 7586(1) | 4698(1) | 7481(1) | 22(1) |
| <b>P(3)</b>  | 6667(1) | 5387(1) | 6620(1) | 24(1) |
| <b>P(4)</b>  | 7259(1) | 5688(1) | 8218(1) | 22(1) |
| <b>O(2)</b>  | 9216(2) | 3319(2) | 9195(2) | 39(1) |

**Table S9.** Bond lengths [ $\text{\AA}$ ] and angles [ $^\circ$ ] for **11**.

|                   |                 |
|-------------------|-----------------|
| <b>C(1)-C(2)</b>  | <b>1.534(6)</b> |
| <b>C(1)-P(2)</b>  | 1.846(5)        |
| <b>C(1)-H(1A)</b> | 0.9900          |
| <b>C(1)-H(1B)</b> | 0.9900          |
| <b>C(2)-P(1)</b>  | 1.854(4)        |
| <b>C(2)-H(2A)</b> | 0.9900          |
| <b>C(2)-H(2B)</b> | 0.9900          |

|                     |          |
|---------------------|----------|
| <b>C(3)-C(4)</b>    | 1.526(6) |
| <b>C(3)-C(5)</b>    | 1.531(6) |
| <b>C(3)-P(1)</b>    | 1.852(4) |
| <b>C(3)-H(3)</b>    | 1.0000   |
| <b>C(4)-H(4A)</b>   | 0.9800   |
| <b>C(4)-H(4B)</b>   | 0.9800   |
| <b>C(4)-H(4C)</b>   | 0.9800   |
| <b>C(5)-H(5A)</b>   | 0.9800   |
| <b>C(5)-H(5B)</b>   | 0.9800   |
| <b>C(5)-H(5C)</b>   | 0.9800   |
| <b>C(6)-C(7)</b>    | 1.525(6) |
| <b>C(6)-C(8)</b>    | 1.532(6) |
| <b>C(6)-P(1)</b>    | 1.844(4) |
| <b>C(6)-H(6)</b>    | 1.0000   |
| <b>C(7)-H(7A)</b>   | 0.9800   |
| <b>C(7)-H(7B)</b>   | 0.9800   |
| <b>C(7)-H(7C)</b>   | 0.9800   |
| <b>C(8)-H(8A)</b>   | 0.9800   |
| <b>C(8)-H(8B)</b>   | 0.9800   |
| <b>C(8)-H(8C)</b>   | 0.9800   |
| <b>C(9)-C(11)</b>   | 1.532(6) |
| <b>C(9)-C(10)</b>   | 1.539(6) |
| <b>C(9)-P(2)</b>    | 1.846(4) |
| <b>C(9)-H(9)</b>    | 1.0000   |
| <b>C(10)-H(10A)</b> | 0.9800   |
| <b>C(10)-H(10B)</b> | 0.9800   |
| <b>C(10)-H(10C)</b> | 0.9800   |
| <b>C(11)-H(11A)</b> | 0.9800   |
| <b>C(11)-H(11B)</b> | 0.9800   |
| <b>C(11)-H(11C)</b> | 0.9800   |
| <b>C(12)-C(13)</b>  | 1.522(6) |
| <b>C(12)-C(14)</b>  | 1.533(6) |
| <b>C(12)-P(2)</b>   | 1.856(4) |
| <b>C(12)-H(12)</b>  | 1.0000   |
| <b>C(13)-H(13A)</b> | 0.9800   |
| <b>C(13)-H(13B)</b> | 0.9800   |
| <b>C(13)-H(13C)</b> | 0.9800   |

|                     |            |
|---------------------|------------|
| <b>C(14)-H(14A)</b> | 0.9800     |
| <b>C(14)-H(14B)</b> | 0.9800     |
| <b>C(14)-H(14C)</b> | 0.9800     |
| <b>C(15)-C(18)</b>  | 1.335(6)   |
| <b>C(15)-C(16)</b>  | 1.449(6)   |
| <b>C(15)-Ni(1)</b>  | 1.951(4)   |
| <b>C(16)-C(17)</b>  | 1.341(7)   |
| <b>C(16)-H(16)</b>  | 0.9500     |
| <b>C(17)-O(1)</b>   | 1.363(6)   |
| <b>C(17)-H(17)</b>  | 0.9500     |
| <b>C(18)-O(1)</b>   | 1.397(5)   |
| <b>C(18)-H(18)</b>  | 0.9500     |
| <b>C(19)-N(1)</b>   | 1.160(6)   |
| <b>C(19)-Ni(1)</b>  | 1.883(5)   |
| <b>Ni(1)-P(1)</b>   | 2.1788(12) |
| <b>Ni(1)-P(2)</b>   | 2.1930(12) |
| <b>C(20)-C(21)</b>  | 1.558(6)   |
| <b>C(20)-P(4)</b>   | 1.849(4)   |
| <b>C(20)-H(20A)</b> | 0.9900     |
| <b>C(20)-H(20B)</b> | 0.9900     |
| <b>C(21)-P(3)</b>   | 1.831(5)   |
| <b>C(21)-H(21A)</b> | 0.9900     |
| <b>C(21)-H(21B)</b> | 0.9900     |
| <b>C(22)-C(24)</b>  | 1.529(6)   |
| <b>C(22)-C(23)</b>  | 1.530(7)   |
| <b>C(22)-P(3)</b>   | 1.844(5)   |
| <b>C(22)-H(22)</b>  | 1.0000     |
| <b>C(23)-H(23A)</b> | 0.9800     |
| <b>C(23)-H(23B)</b> | 0.9800     |
| <b>C(23)-H(23C)</b> | 0.9800     |
| <b>C(24)-H(24A)</b> | 0.9800     |
| <b>C(24)-H(24B)</b> | 0.9800     |
| <b>C(24)-H(24C)</b> | 0.9800     |
| <b>C(25)-C(27)</b>  | 1.519(7)   |
| <b>C(25)-C(26)</b>  | 1.541(7)   |
| <b>C(25)-P(3)</b>   | 1.854(4)   |
| <b>C(25)-H(25)</b>  | 1.0000     |

|              |          |
|--------------|----------|
| C(26)-H(26A) | 0.9800   |
| C(26)-H(26B) | 0.9800   |
| C(26)-H(26C) | 0.9800   |
| C(27)-H(27A) | 0.9800   |
| C(27)-H(27B) | 0.9800   |
| C(27)-H(27C) | 0.9800   |
| C(28)-C(29)  | 1.535(6) |
| C(28)-C(30)  | 1.538(6) |
| C(28)-P(4)   | 1.850(4) |
| C(28)-H(28)  | 1.0000   |
| C(29)-H(29A) | 0.9800   |
| C(29)-H(29B) | 0.9800   |
| C(29)-H(29C) | 0.9800   |
| C(30)-H(30A) | 0.9800   |
| C(30)-H(30B) | 0.9800   |
| C(30)-H(30C) | 0.9800   |
| C(31)-C(33)  | 1.533(6) |
| C(31)-C(32)  | 1.533(6) |
| C(31)-P(4)   | 1.837(4) |
| C(31)-H(31)  | 1.0000   |
| C(32)-H(32A) | 0.9800   |
| C(32)-H(32B) | 0.9800   |
| C(32)-H(32C) | 0.9800   |
| C(33)-H(33A) | 0.9800   |
| C(33)-H(33B) | 0.9800   |
| C(33)-H(33C) | 0.9800   |
| C(34)-C(37)  | 1.331(6) |
| C(34)-C(35)  | 1.446(6) |
| C(34)-Ni(2)  | 1.948(4) |
| C(35)-C(36)  | 1.345(7) |
| C(35)-H(35)  | 0.9500   |
| C(36)-O(2)   | 1.363(6) |
| C(36)-H(36)  | 0.9500   |
| C(37)-O(2)   | 1.397(5) |
| C(37)-H(37)  | 0.9500   |
| C(38)-N(2)   | 1.169(6) |
| C(38)-Ni(2)  | 1.880(5) |

|                         |            |
|-------------------------|------------|
| <b>Ni(2)-P(4)</b>       | 2.1793(12) |
| <b>Ni(2)-P(3)</b>       | 2.1801(12) |
|                         |            |
| <b>C(2)-C(1)-P(2)</b>   | 111.3(3)   |
| <b>C(2)-C(1)-H(1A)</b>  | 109.4      |
| <b>P(2)-C(1)-H(1A)</b>  | 109.4      |
| <b>C(2)-C(1)-H(1B)</b>  | 109.4      |
| <b>P(2)-C(1)-H(1B)</b>  | 109.4      |
| <b>H(1A)-C(1)-H(1B)</b> | 108.0      |
| <b>C(1)-C(2)-P(1)</b>   | 112.0(3)   |
| <b>C(1)-C(2)-H(2A)</b>  | 109.2      |
| <b>P(1)-C(2)-H(2A)</b>  | 109.2      |
| <b>C(1)-C(2)-H(2B)</b>  | 109.2      |
| <b>P(1)-C(2)-H(2B)</b>  | 109.2      |
| <b>H(2A)-C(2)-H(2B)</b> | 107.9      |
| <b>C(4)-C(3)-C(5)</b>   | 110.6(4)   |
| <b>C(4)-C(3)-P(1)</b>   | 110.1(3)   |
| <b>C(5)-C(3)-P(1)</b>   | 114.0(3)   |
| <b>C(4)-C(3)-H(3)</b>   | 107.3      |
| <b>C(5)-C(3)-H(3)</b>   | 107.3      |
| <b>P(1)-C(3)-H(3)</b>   | 107.3      |
| <b>C(3)-C(4)-H(4A)</b>  | 109.5      |
| <b>C(3)-C(4)-H(4B)</b>  | 109.5      |
| <b>H(4A)-C(4)-H(4B)</b> | 109.5      |
| <b>C(3)-C(4)-H(4C)</b>  | 109.5      |
| <b>H(4A)-C(4)-H(4C)</b> | 109.5      |
| <b>H(4B)-C(4)-H(4C)</b> | 109.5      |
| <b>C(3)-C(5)-H(5A)</b>  | 109.5      |
| <b>C(3)-C(5)-H(5B)</b>  | 109.5      |
| <b>H(5A)-C(5)-H(5B)</b> | 109.5      |
| <b>C(3)-C(5)-H(5C)</b>  | 109.5      |
| <b>H(5A)-C(5)-H(5C)</b> | 109.5      |
| <b>H(5B)-C(5)-H(5C)</b> | 109.5      |
| <b>C(7)-C(6)-C(8)</b>   | 111.2(4)   |
| <b>C(7)-C(6)-P(1)</b>   | 110.7(3)   |
| <b>C(8)-C(6)-P(1)</b>   | 112.8(3)   |
| <b>C(7)-C(6)-H(6)</b>   | 107.3      |

|                            |          |
|----------------------------|----------|
| <b>C(8)-C(6)-H(6)</b>      | 107.3    |
| <b>P(1)-C(6)-H(6)</b>      | 107.3    |
| <b>C(6)-C(7)-H(7A)</b>     | 109.5    |
| <b>C(6)-C(7)-H(7B)</b>     | 109.5    |
| <b>H(7A)-C(7)-H(7B)</b>    | 109.5    |
| <b>C(6)-C(7)-H(7C)</b>     | 109.5    |
| <b>H(7A)-C(7)-H(7C)</b>    | 109.5    |
| <b>H(7B)-C(7)-H(7C)</b>    | 109.5    |
| <b>C(6)-C(8)-H(8A)</b>     | 109.5    |
| <b>C(6)-C(8)-H(8B)</b>     | 109.5    |
| <b>H(8A)-C(8)-H(8B)</b>    | 109.5    |
| <b>C(6)-C(8)-H(8C)</b>     | 109.5    |
| <b>H(8A)-C(8)-H(8C)</b>    | 109.5    |
| <b>H(8B)-C(8)-H(8C)</b>    | 109.5    |
| <b>C(11)-C(9)-C(10)</b>    | 112.2(4) |
| <b>C(11)-C(9)-P(2)</b>     | 112.9(3) |
| <b>C(10)-C(9)-P(2)</b>     | 109.8(3) |
| <b>C(11)-C(9)-H(9)</b>     | 107.2    |
| <b>C(10)-C(9)-H(9)</b>     | 107.2    |
| <b>P(2)-C(9)-H(9)</b>      | 107.2    |
| <b>C(9)-C(10)-H(10A)</b>   | 109.5    |
| <b>C(9)-C(10)-H(10B)</b>   | 109.5    |
| <b>H(10A)-C(10)-H(10B)</b> | 109.5    |
| <b>C(9)-C(10)-H(10C)</b>   | 109.5    |
| <b>H(10A)-C(10)-H(10C)</b> | 109.5    |
| <b>H(10B)-C(10)-H(10C)</b> | 109.5    |
| <b>C(9)-C(11)-H(11A)</b>   | 109.5    |
| <b>C(9)-C(11)-H(11B)</b>   | 109.5    |
| <b>H(11A)-C(11)-H(11B)</b> | 109.5    |
| <b>C(9)-C(11)-H(11C)</b>   | 109.5    |
| <b>H(11A)-C(11)-H(11C)</b> | 109.5    |
| <b>H(11B)-C(11)-H(11C)</b> | 109.5    |
| <b>C(13)-C(12)-C(14)</b>   | 110.8(4) |
| <b>C(13)-C(12)-P(2)</b>    | 110.2(3) |
| <b>C(14)-C(12)-P(2)</b>    | 112.3(3) |
| <b>C(13)-C(12)-H(12)</b>   | 107.8    |
| <b>C(14)-C(12)-H(12)</b>   | 107.8    |

|                            |            |
|----------------------------|------------|
| <b>P(2)-C(12)-H(12)</b>    | 107.8      |
| <b>C(12)-C(13)-H(13A)</b>  | 109.5      |
| <b>C(12)-C(13)-H(13B)</b>  | 109.5      |
| <b>H(13A)-C(13)-H(13B)</b> | 109.5      |
| <b>C(12)-C(13)-H(13C)</b>  | 109.5      |
| <b>H(13A)-C(13)-H(13C)</b> | 109.5      |
| <b>H(13B)-C(13)-H(13C)</b> | 109.5      |
| <b>C(12)-C(14)-H(14A)</b>  | 109.5      |
| <b>C(12)-C(14)-H(14B)</b>  | 109.5      |
| <b>H(14A)-C(14)-H(14B)</b> | 109.5      |
| <b>C(12)-C(14)-H(14C)</b>  | 109.5      |
| <b>H(14A)-C(14)-H(14C)</b> | 109.5      |
| <b>H(14B)-C(14)-H(14C)</b> | 109.5      |
| <b>C(18)-C(15)-C(16)</b>   | 103.1(4)   |
| <b>C(18)-C(15)-Ni(1)</b>   | 134.5(3)   |
| <b>C(16)-C(15)-Ni(1)</b>   | 122.3(3)   |
| <b>C(17)-C(16)-C(15)</b>   | 108.5(4)   |
| <b>C(17)-C(16)-H(16)</b>   | 125.8      |
| <b>C(15)-C(16)-H(16)</b>   | 125.8      |
| <b>C(16)-C(17)-O(1)</b>    | 110.7(4)   |
| <b>C(16)-C(17)-H(17)</b>   | 124.6      |
| <b>O(1)-C(17)-H(17)</b>    | 124.6      |
| <b>C(15)-C(18)-O(1)</b>    | 113.5(4)   |
| <b>C(15)-C(18)-H(18)</b>   | 123.2      |
| <b>O(1)-C(18)-H(18)</b>    | 123.2      |
| <b>N(1)-C(19)-Ni(1)</b>    | 175.5(4)   |
| <b>C(19)-Ni(1)-C(15)</b>   | 89.32(18)  |
| <b>C(19)-Ni(1)-P(1)</b>    | 174.00(14) |
| <b>C(15)-Ni(1)-P(1)</b>    | 91.95(13)  |
| <b>C(19)-Ni(1)-P(2)</b>    | 89.68(13)  |
| <b>C(15)-Ni(1)-P(2)</b>    | 177.25(14) |
| <b>P(1)-Ni(1)-P(2)</b>     | 88.79(4)   |
| <b>C(9)-P(2)-C(1)</b>      | 104.9(2)   |
| <b>C(9)-P(2)-C(12)</b>     | 104.3(2)   |
| <b>C(1)-P(2)-C(12)</b>     | 105.0(2)   |
| <b>C(9)-P(2)-Ni(1)</b>     | 116.07(15) |
| <b>C(1)-P(2)-Ni(1)</b>     | 109.41(14) |



|                            |            |
|----------------------------|------------|
| <b>C(12)-P(2)-Ni(1)</b>    | 116.07(15) |
| <b>C(6)-P(1)-C(3)</b>      | 104.11(19) |
| <b>C(6)-P(1)-C(2)</b>      | 102.59(19) |
| <b>C(3)-P(1)-C(2)</b>      | 104.0(2)   |
| <b>C(6)-P(1)-Ni(1)</b>     | 119.92(15) |
| <b>C(3)-P(1)-Ni(1)</b>     | 114.94(15) |
| <b>C(2)-P(1)-Ni(1)</b>     | 109.52(14) |
| <b>C(17)-O(1)-C(18)</b>    | 104.2(4)   |
| <b>C(21)-C(20)-P(4)</b>    | 111.3(3)   |
| <b>C(21)-C(20)-H(20A)</b>  | 109.4      |
| <b>P(4)-C(20)-H(20A)</b>   | 109.4      |
| <b>C(21)-C(20)-H(20B)</b>  | 109.4      |
| <b>P(4)-C(20)-H(20B)</b>   | 109.4      |
| <b>H(20A)-C(20)-H(20B)</b> | 108.0      |
| <b>C(20)-C(21)-P(3)</b>    | 110.7(3)   |
| <b>C(20)-C(21)-H(21A)</b>  | 109.5      |
| <b>P(3)-C(21)-H(21A)</b>   | 109.5      |
| <b>C(20)-C(21)-H(21B)</b>  | 109.5      |
| <b>P(3)-C(21)-H(21B)</b>   | 109.5      |
| <b>H(21A)-C(21)-H(21B)</b> | 108.1      |
| <b>C(24)-C(22)-C(23)</b>   | 111.4(4)   |
| <b>C(24)-C(22)-P(3)</b>    | 114.1(3)   |
| <b>C(23)-C(22)-P(3)</b>    | 111.3(3)   |
| <b>C(24)-C(22)-H(22)</b>   | 106.5      |
| <b>C(23)-C(22)-H(22)</b>   | 106.5      |
| <b>P(3)-C(22)-H(22)</b>    | 106.5      |
| <b>C(22)-C(23)-H(23A)</b>  | 109.5      |
| <b>C(22)-C(23)-H(23B)</b>  | 109.5      |
| <b>H(23A)-C(23)-H(23B)</b> | 109.5      |
| <b>C(22)-C(23)-H(23C)</b>  | 109.5      |
| <b>H(23A)-C(23)-H(23C)</b> | 109.5      |
| <b>H(23B)-C(23)-H(23C)</b> | 109.5      |
| <b>C(22)-C(24)-H(24A)</b>  | 109.5      |
| <b>C(22)-C(24)-H(24B)</b>  | 109.5      |
| <b>H(24A)-C(24)-H(24B)</b> | 109.5      |
| <b>C(22)-C(24)-H(24C)</b>  | 109.5      |
| <b>H(24A)-C(24)-H(24C)</b> | 109.5      |

|                            |          |
|----------------------------|----------|
| <b>H(24B)-C(24)-H(24C)</b> | 109.5    |
| <b>C(27)-C(25)-C(26)</b>   | 110.9(4) |
| <b>C(27)-C(25)-P(3)</b>    | 110.7(3) |
| <b>C(26)-C(25)-P(3)</b>    | 111.3(3) |
| <b>C(27)-C(25)-H(25)</b>   | 107.9    |
| <b>C(26)-C(25)-H(25)</b>   | 107.9    |
| <b>P(3)-C(25)-H(25)</b>    | 107.9    |
| <b>C(25)-C(26)-H(26A)</b>  | 109.5    |
| <b>C(25)-C(26)-H(26B)</b>  | 109.5    |
| <b>H(26A)-C(26)-H(26B)</b> | 109.5    |
| <b>C(25)-C(26)-H(26C)</b>  | 109.5    |
| <b>H(26A)-C(26)-H(26C)</b> | 109.5    |
| <b>H(26B)-C(26)-H(26C)</b> | 109.5    |
| <b>C(25)-C(27)-H(27A)</b>  | 109.5    |
| <b>C(25)-C(27)-H(27B)</b>  | 109.5    |
| <b>H(27A)-C(27)-H(27B)</b> | 109.5    |
| <b>C(25)-C(27)-H(27C)</b>  | 109.5    |
| <b>H(27A)-C(27)-H(27C)</b> | 109.5    |
| <b>H(27B)-C(27)-H(27C)</b> | 109.5    |
| <b>C(29)-C(28)-C(30)</b>   | 111.4(4) |
| <b>C(29)-C(28)-P(4)</b>    | 109.7(3) |
| <b>C(30)-C(28)-P(4)</b>    | 113.3(3) |
| <b>C(29)-C(28)-H(28)</b>   | 107.4    |
| <b>C(30)-C(28)-H(28)</b>   | 107.4    |
| <b>P(4)-C(28)-H(28)</b>    | 107.4    |
| <b>C(28)-C(29)-H(29A)</b>  | 109.5    |
| <b>C(28)-C(29)-H(29B)</b>  | 109.5    |
| <b>H(29A)-C(29)-H(29B)</b> | 109.5    |
| <b>C(28)-C(29)-H(29C)</b>  | 109.5    |
| <b>H(29A)-C(29)-H(29C)</b> | 109.5    |
| <b>H(29B)-C(29)-H(29C)</b> | 109.5    |
| <b>C(28)-C(30)-H(30A)</b>  | 109.5    |
| <b>C(28)-C(30)-H(30B)</b>  | 109.5    |
| <b>H(30A)-C(30)-H(30B)</b> | 109.5    |
| <b>C(28)-C(30)-H(30C)</b>  | 109.5    |
| <b>H(30A)-C(30)-H(30C)</b> | 109.5    |
| <b>H(30B)-C(30)-H(30C)</b> | 109.5    |

|                     |            |
|---------------------|------------|
| C(33)-C(31)-C(32)   | 111.8(4)   |
| C(33)-C(31)-P(4)    | 110.6(3)   |
| C(32)-C(31)-P(4)    | 113.1(3)   |
| C(33)-C(31)-H(31)   | 107.0      |
| C(32)-C(31)-H(31)   | 107.0      |
| P(4)-C(31)-H(31)    | 107.0      |
| C(31)-C(32)-H(32A)  | 109.5      |
| C(31)-C(32)-H(32B)  | 109.5      |
| H(32A)-C(32)-H(32B) | 109.5      |
| C(31)-C(32)-H(32C)  | 109.5      |
| H(32A)-C(32)-H(32C) | 109.5      |
| H(32B)-C(32)-H(32C) | 109.5      |
| C(31)-C(33)-H(33A)  | 109.5      |
| C(31)-C(33)-H(33B)  | 109.5      |
| H(33A)-C(33)-H(33B) | 109.5      |
| C(31)-C(33)-H(33C)  | 109.5      |
| H(33A)-C(33)-H(33C) | 109.5      |
| H(33B)-C(33)-H(33C) | 109.5      |
| C(37)-C(34)-C(35)   | 103.6(4)   |
| C(37)-C(34)-Ni(2)   | 133.4(3)   |
| C(35)-C(34)-Ni(2)   | 122.9(3)   |
| C(36)-C(35)-C(34)   | 108.1(4)   |
| C(36)-C(35)-H(35)   | 125.9      |
| C(34)-C(35)-H(35)   | 125.9      |
| C(35)-C(36)-O(2)    | 110.7(4)   |
| C(35)-C(36)-H(36)   | 124.7      |
| O(2)-C(36)-H(36)    | 124.7      |
| C(34)-C(37)-O(2)    | 113.3(4)   |
| C(34)-C(37)-H(37)   | 123.3      |
| O(2)-C(37)-H(37)    | 123.3      |
| N(2)-C(38)-Ni(2)    | 176.9(4)   |
| C(38)-Ni(2)-C(34)   | 88.85(18)  |
| C(38)-Ni(2)-P(4)    | 174.41(15) |
| C(34)-Ni(2)-P(4)    | 92.90(13)  |
| C(38)-Ni(2)-P(3)    | 89.42(13)  |
| C(34)-Ni(2)-P(3)    | 177.08(14) |
| P(4)-Ni(2)-P(3)     | 88.60(5)   |

|                  |            |
|------------------|------------|
| C(21)-P(3)-C(22) | 105.8(2)   |
| C(21)-P(3)-C(25) | 104.9(2)   |
| C(22)-P(3)-C(25) | 104.2(2)   |
| C(21)-P(3)-Ni(2) | 110.31(15) |
| C(22)-P(3)-Ni(2) | 114.49(15) |
| C(25)-P(3)-Ni(2) | 116.12(16) |
| C(31)-P(4)-C(20) | 103.7(2)   |
| C(31)-P(4)-C(28) | 104.3(2)   |
| C(20)-P(4)-C(28) | 104.3(2)   |
| C(31)-P(4)-Ni(2) | 118.82(16) |
| C(20)-P(4)-Ni(2) | 109.56(14) |
| C(28)-P(4)-Ni(2) | 114.73(15) |
| C(36)-O(2)-C(37) | 104.2(4)   |

**Table S10.** Anisotropic displacement parameters ( $\text{\AA}^2 \times 10^3$ ) for **11**. The anisotropic displacement factor exponent takes the form:  $-2\pi^2 [h^2 a^{*2} U^{11} + \dots + 2 h k a^* b^* U^{12}]$

|       | $U^{11}$ | $U^{22}$ | $U^{33}$ | $U^{23}$ | $U^{13}$ | $U^{12}$ |
|-------|----------|----------|----------|----------|----------|----------|
| C(1)  | 28(2)    | 24(2)    | 28(2)    | -4(2)    | 4(2)     | -2(2)    |
| C(2)  | 22(2)    | 21(2)    | 29(2)    | 2(2)     | 5(2)     | -5(2)    |
| C(3)  | 24(2)    | 31(3)    | 28(2)    | 6(2)     | 9(2)     | 6(2)     |
| C(4)  | 39(3)    | 48(3)    | 42(3)    | 6(3)     | 16(2)    | 22(3)    |
| C(5)  | 25(2)    | 40(3)    | 44(3)    | 12(2)    | 1(2)     | 4(2)     |
| C(6)  | 21(2)    | 30(2)    | 25(2)    | -6(2)    | 6(2)     | -2(2)    |
| C(7)  | 29(2)    | 40(3)    | 35(2)    | -12(2)   | 10(2)    | 5(2)     |
| C(8)  | 36(3)    | 49(3)    | 25(2)    | -1(2)    | 12(2)    | 0(2)     |
| C(9)  | 31(2)    | 33(3)    | 25(2)    | -2(2)    | 12(2)    | 1(2)     |
| C(10) | 38(3)    | 54(3)    | 35(3)    | -5(2)    | 16(2)    | 8(3)     |
| C(11) | 47(3)    | 40(3)    | 28(2)    | -4(2)    | 10(2)    | 0(2)     |
| C(12) | 23(2)    | 27(2)    | 26(2)    | 2(2)     | 5(2)     | 0(2)     |
| C(13) | 26(2)    | 40(3)    | 37(3)    | 8(2)     | 11(2)    | 7(2)     |
| C(14) | 35(2)    | 33(3)    | 33(2)    | 4(2)     | 7(2)     | 8(2)     |
| C(15) | 21(2)    | 25(2)    | 30(2)    | 0(2)     | 2(2)     | -5(2)    |
| C(16) | 28(2)    | 30(3)    | 36(2)    | 3(2)     | 4(2)     | -3(2)    |
| C(17) | 25(2)    | 38(3)    | 44(3)    | 6(2)     | 3(2)     | -3(2)    |

|              |       |       |       |        |       |        |
|--------------|-------|-------|-------|--------|-------|--------|
| <b>C(18)</b> | 26(2) | 35(3) | 32(2) | 1(2)   | 4(2)  | -3(2)  |
| <b>C(19)</b> | 18(2) | 35(3) | 28(2) | -9(2)  | 3(2)  | -5(2)  |
| <b>N(1)</b>  | 37(2) | 39(2) | 36(2) | 6(2)   | 9(2)  | -5(2)  |
| <b>Ni(1)</b> | 20(1) | 24(1) | 24(1) | 0(1)   | 6(1)  | 0(1)   |
| <b>P(2)</b>  | 23(1) | 25(1) | 21(1) | -1(1)  | 7(1)  | 0(1)   |
| <b>P(1)</b>  | 19(1) | 24(1) | 21(1) | 0(1)   | 6(1)  | 2(1)   |
| <b>O(1)</b>  | 37(2) | 34(2) | 34(2) | -1(2)  | -3(1) | -8(2)  |
| <b>C(20)</b> | 19(2) | 25(2) | 31(2) | -1(2)  | 3(2)  | 5(2)   |
| <b>C(21)</b> | 28(2) | 35(3) | 29(2) | 3(2)   | 5(2)  | 4(2)   |
| <b>C(22)</b> | 36(2) | 27(2) | 25(2) | 2(2)   | 7(2)  | 8(2)   |
| <b>C(23)</b> | 42(3) | 44(3) | 32(2) | -2(2)  | 17(2) | -4(2)  |
| <b>C(24)</b> | 51(3) | 41(3) | 31(2) | 8(2)   | 8(2)  | 10(3)  |
| <b>C(25)</b> | 24(2) | 36(3) | 32(2) | -3(2)  | -2(2) | -2(2)  |
| <b>C(26)</b> | 34(3) | 38(3) | 39(3) | -7(2)  | 2(2)  | -2(2)  |
| <b>C(27)</b> | 30(3) | 61(4) | 52(3) | -20(3) | 15(2) | -22(3) |
| <b>C(28)</b> | 22(2) | 31(3) | 30(2) | -6(2)  | 5(2)  | -8(2)  |
| <b>C(29)</b> | 34(3) | 53(3) | 41(3) | -5(3)  | 18(2) | -20(2) |
| <b>C(30)</b> | 32(2) | 35(3) | 41(3) | -5(2)  | -5(2) | -4(2)  |
| <b>C(31)</b> | 25(2) | 32(2) | 25(2) | 2(2)   | 9(2)  | -3(2)  |
| <b>C(32)</b> | 42(3) | 43(3) | 30(2) | -2(2)  | 16(2) | 0(2)   |
| <b>C(33)</b> | 37(3) | 38(3) | 36(3) | 0(2)   | 15(2) | -12(2) |
| <b>C(34)</b> | 19(2) | 29(2) | 28(2) | -5(2)  | 3(2)  | 2(2)   |
| <b>C(35)</b> | 25(2) | 35(3) | 39(3) | 0(2)   | 8(2)  | -1(2)  |
| <b>C(36)</b> | 29(2) | 39(3) | 42(3) | -6(2)  | -2(2) | 2(2)   |
| <b>C(37)</b> | 33(2) | 31(3) | 28(2) | -3(2)  | 5(2)  | 7(2)   |
| <b>C(38)</b> | 20(2) | 38(3) | 26(2) | 6(2)   | 2(2)  | 2(2)   |
| <b>N(2)</b>  | 39(2) | 37(2) | 34(2) | -1(2)  | 14(2) | 5(2)   |
| <b>Ni(2)</b> | 21(1) | 25(1) | 22(1) | 0(1)   | 5(1)  | 1(1)   |
| <b>P(3)</b>  | 23(1) | 28(1) | 22(1) | 0(1)   | 5(1)  | 1(1)   |
| <b>P(4)</b>  | 18(1) | 24(1) | 22(1) | -1(1)  | 5(1)  | -2(1)  |
| <b>O(2)</b>  | 41(2) | 43(2) | 30(2) | -1(2)  | 1(1)  | 8(2)   |

**Table S11** Torsion angles [°] for **11**.

|                                |                |
|--------------------------------|----------------|
| <b>P(2)-C(1)-C(2)-P(1)</b>     | <b>32.9(4)</b> |
| <b>C(18)-C(15)-C(16)-C(17)</b> | <b>-0.7(5)</b> |

|                         |           |
|-------------------------|-----------|
| Ni(1)-C(15)-C(16)-C(17) | 177.4(3)  |
| C(15)-C(16)-C(17)-O(1)  | 0.8(6)    |
| C(16)-C(15)-C(18)-O(1)  | 0.4(5)    |
| Ni(1)-C(15)-C(18)-O(1)  | -177.4(3) |
| C(11)-C(9)-P(2)-C(1)    | -52.9(4)  |
| C(10)-C(9)-P(2)-C(1)    | 73.1(4)   |
| C(11)-C(9)-P(2)-C(12)   | 57.2(4)   |
| C(10)-C(9)-P(2)-C(12)   | -176.8(3) |
| C(11)-C(9)-P(2)-Ni(1)   | -173.8(3) |
| C(10)-C(9)-P(2)-Ni(1)   | -47.8(4)  |
| C(2)-C(1)-P(2)-C(9)     | -152.8(3) |
| C(2)-C(1)-P(2)-C(12)    | 97.6(3)   |
| C(2)-C(1)-P(2)-Ni(1)    | -27.6(3)  |
| C(13)-C(12)-P(2)-C(9)   | 177.7(3)  |
| C(14)-C(12)-P(2)-C(9)   | 53.6(4)   |
| C(13)-C(12)-P(2)-C(1)   | -72.2(4)  |
| C(14)-C(12)-P(2)-C(1)   | 163.7(3)  |
| C(13)-C(12)-P(2)-Ni(1)  | 48.7(4)   |
| C(14)-C(12)-P(2)-Ni(1)  | -75.4(3)  |
| C(7)-C(6)-P(1)-C(3)     | -172.9(3) |
| C(8)-C(6)-P(1)-C(3)     | 61.8(3)   |
| C(7)-C(6)-P(1)-C(2)     | 78.9(3)   |
| C(8)-C(6)-P(1)-C(2)     | -46.4(3)  |
| C(7)-C(6)-P(1)-Ni(1)    | -42.6(3)  |
| C(8)-C(6)-P(1)-Ni(1)    | -168.0(3) |
| C(4)-C(3)-P(1)-C(6)     | -177.0(3) |
| C(5)-C(3)-P(1)-C(6)     | 58.0(4)   |
| C(4)-C(3)-P(1)-C(2)     | -69.9(4)  |
| C(5)-C(3)-P(1)-C(2)     | 165.1(3)  |
| C(4)-C(3)-P(1)-Ni(1)    | 49.8(4)   |
| C(5)-C(3)-P(1)-Ni(1)    | -75.1(3)  |
| C(1)-C(2)-P(1)-C(6)     | -153.2(3) |
| C(1)-C(2)-P(1)-C(3)     | 98.5(3)   |
| C(1)-C(2)-P(1)-Ni(1)    | -24.8(3)  |
| C(16)-C(17)-O(1)-C(18)  | -0.6(5)   |
| C(15)-C(18)-O(1)-C(17)  | 0.1(5)    |
| P(4)-C(20)-C(21)-P(3)   | 33.7(4)   |

|                         |           |
|-------------------------|-----------|
| C(37)-C(34)-C(35)-C(36) | -1.5(5)   |
| Ni(2)-C(34)-C(35)-C(36) | -179.6(3) |
| C(34)-C(35)-C(36)-O(2)  | 1.5(6)    |
| C(35)-C(34)-C(37)-O(2)  | 0.9(5)    |
| Ni(2)-C(34)-C(37)-O(2)  | 178.8(3)  |
| C(20)-C(21)-P(3)-C(22)  | -151.8(3) |
| C(20)-C(21)-P(3)-C(25)  | 98.3(3)   |
| C(20)-C(21)-P(3)-Ni(2)  | -27.5(3)  |
| C(24)-C(22)-P(3)-C(21)  | -57.6(4)  |
| C(23)-C(22)-P(3)-C(21)  | 69.5(4)   |
| C(24)-C(22)-P(3)-C(25)  | 52.7(4)   |
| C(23)-C(22)-P(3)-C(25)  | 179.8(3)  |
| C(24)-C(22)-P(3)-Ni(2)  | -179.4(3) |
| C(23)-C(22)-P(3)-Ni(2)  | -52.3(4)  |
| C(27)-C(25)-P(3)-C(21)  | -68.2(4)  |
| C(26)-C(25)-P(3)-C(21)  | 168.0(3)  |
| C(27)-C(25)-P(3)-C(22)  | -179.2(4) |
| C(26)-C(25)-P(3)-C(22)  | 57.0(4)   |
| C(27)-C(25)-P(3)-Ni(2)  | 53.9(4)   |
| C(26)-C(25)-P(3)-Ni(2)  | -69.9(4)  |
| C(33)-C(31)-P(4)-C(20)  | 76.0(4)   |
| C(32)-C(31)-P(4)-C(20)  | -50.2(4)  |
| C(33)-C(31)-P(4)-C(28)  | -175.1(3) |
| C(32)-C(31)-P(4)-C(28)  | 58.7(4)   |
| C(33)-C(31)-P(4)-Ni(2)  | -45.8(4)  |
| C(32)-C(31)-P(4)-Ni(2)  | -172.0(3) |
| C(21)-C(20)-P(4)-C(31)  | -154.2(3) |
| C(21)-C(20)-P(4)-C(28)  | 96.9(3)   |
| C(21)-C(20)-P(4)-Ni(2)  | -26.4(3)  |
| C(29)-C(28)-P(4)-C(31)  | 176.9(3)  |
| C(30)-C(28)-P(4)-C(31)  | 51.7(4)   |
| C(29)-C(28)-P(4)-C(20)  | -74.6(4)  |
| C(30)-C(28)-P(4)-C(20)  | 160.1(3)  |
| C(29)-C(28)-P(4)-Ni(2)  | 45.2(4)   |
| C(30)-C(28)-P(4)-Ni(2)  | -80.0(3)  |
| C(35)-C(36)-O(2)-C(37)  | -0.9(5)   |
| C(34)-C(37)-O(2)-C(36)  | -0.1(5)   |

**Table S12.** Hydrogen bonds for **11** [ $\text{\AA}$  and  $^\circ$ ].

| <b>D-H...A</b>               | <b>d(D-H)</b> | <b>d(H...A)</b> | <b>d(D...A)</b> | <b>&lt;(DHA)</b> |
|------------------------------|---------------|-----------------|-----------------|------------------|
| <b>C(3)-H(3)...N(1)#1</b>    | 1.00          | 2.52            | 3.467(6)        | 158.6            |
| <b>C(17)-H(17)...N(2)#2</b>  | 0.95          | 2.48            | 3.410(6)        | 164.5            |
| <b>C(20)-H(20B)...N(2)#3</b> | 0.99          | 2.55            | 3.525(6)        | 168.1            |
| <b>C(24)-H(24B)...O(2)#3</b> | 0.98          | 2.58            | 3.561(7)        | 175.5            |
| <b>C(28)-H(28)...N(2)#3</b>  | 1.00          | 2.63            | 3.547(6)        | 152.9            |
| <b>C(36)-H(36)...N(1)#4</b>  | 0.95          | 2.61            | 3.522(6)        | 159.8            |

---

Symmetry transformations used to generate equivalent atoms:

#1  $-x+3/2, y+1/2, -z+1/2$  #2  $x-1/2, -y+1/2, z-1/2$

#3  $-x+3/2, y+1/2, -z+3/2$  #4  $x+1/2, -y+1/2, z+1/2$
